# Supplementary material for: Parallel reduction in flowering time from de novo mutations enable evolutionary rescue in colonizing lineages
Source: PubMed Central journal article supplement (PMC8933414; doi:10.1038/s41467-022-28800-z), 2022-03-18
Supplement: 41467_2022_28800_MOESM1_ESM.pdf [file 41467_2022_28800_MOESM1_ESM.pdf]

1

2

**Parallel reductions in flowering time from *de novo* mutations enable**

3

**evolutionary rescue in colonizing lineages**

4

Fulgione and Neto *et al.*

5

6

## 7 **Supplementary Method 1. Sample collection**

8 We collected plants over a series of field expeditions between 2012 and 2019 on Santo Antão  
9 and Fogo, the two islands where *Arabidopsis thaliana* had been recorded in herbarium records  
10 (personal communication, Wolfram Lobin). In addition, we explored possible locations in the  
11 two other islands with the most similar landscape (Santiago and São Nicolau) but found no  
12 evidence of *A. thaliana* there, consistent with a lack of herbarium records. In total, we present  
13 data for 335 accessions from the Cape Verde Islands (Supplementary Data 1), including 189  
14 accessions from 26 stands across four regions in Santo Antão (Cova de Paúl, Lombo de Figueira,  
15 Pico da Cruz and Espungeiro), and 146 accessions from 18 stands across three regions in Fogo  
16 (Lava, Monte Velha and Inferno).

17

## 18 **Supplementary Method 2. Climate data**

19 We downloaded gridded data for climatic and bioclimatic variables at 30 second resolution (~  
20 1 km<sup>2</sup>) in GeoTiff file format for the temporal range of 1970-2000 from WorldClim version 2.1<sup>1</sup>,  
21 including monthly climate data for average temperature and precipitation (12 data layers, i.e. 1  
22 layer for each month) and 19 bioclimatic variables (1 data layer each) which are temperature and  
23 rainfall derived datasets. In addition, we downloaded a raster file for Aridity Index (1 data layer)  
24 from CGIAR Consortium for Spatial Information (CGIAR-CSI)<sup>2</sup>, which is the ratio of  
25 precipitation to potential evapotranspiration, where higher values correspond to more humid  
26 conditions and lower to more arid conditions. In addition, we estimated growing season length

27 using the monthly average temperature and precipitation data obtained from WorldClim. Months  
28 for which mean temperature  $\geq 4^{\circ}\text{C}$  and mean precipitation  $\geq 2 * \text{mean temperature}$  were summed  
29 to produce an estimate of the growing season length<sup>3</sup> using ‘Raster Calculator’ of ArcGIS. We  
30 extracted values for sites where CVI, Moroccan and Eurasian samples had been collected in  
31 ArcGIS and compared distributions of climate variables across regions using Mann Whitney  
32 Wilcoxon (MWW) tests.

33

### 34 **Supplementary Method 3. Sequencing**

35 We sequenced 335 newly collected Cape Verde Islands accessions and Cvi-0 using Illumina  
36 Hi-Seq and HiSeq3000 machines. We extracted genomic DNA using DNeasy Plant Mini kits  
37 (Qiagen), fragmented using sonication (Covaris S2), and prepared libraries with Illumina TruSeq  
38 DNA sample prep kits (Illumina), NEBNext Ultra II FS DNA Library Prep Kit (New England  
39 Biolabs) and NEBNext Ultra II DNA Library Prep Kit (New England Biolabs). Libraries were  
40 immobilized and processed onto a flow cell with cBot (Illumina) and subsequently sequenced  
41 with 2x 100-150 bp paired end reads. We assessed DNA quality and quantity via capillary  
42 electrophoresis (TapeStation, Agilent Technologies) and fluorometry (Qubit and Nanodrop,  
43 Thermo Fisher Scientific). Due to changes in product availability over time, sample preparation  
44 differed slightly between subsets of the sequenced accessions. Sample IDs 12766 to 35519 were  
45 prepared with Illumina TruSeq DNA sample prep kits (Illumina, San Diego, CA), samples in  
46 projects 4073 and 3968 were prepared with NEBNext Ultra II FS DNA Library Prep Kits  
47 (Illumina, New England Biolabs) including four cycles of PCR amplification, and samples from

48 projects 3619, 3541, 3536, and 2876 were prepared with NEBNext Ultra II DNA Library Prep  
49 Kit (Illumina, New England Biolabs) with five cycles of PCR amplification.

50

#### 51 **Supplementary Method 4. SNP identification and genotyping**

52 For Illumina sequence data mapping and genotype calling we used the *A. thaliana* TAIR10  
53 reference genome and we called variants with three different pipelines. Two pipelines were  
54 previously used to call genotypes in the 1135 Eurasian and 64 Moroccan sequences<sup>4</sup>. Here, we  
55 used the same parameters, settings, and software versions in order to analyse the Cape Verdean  
56 and worldwide sequences in a common framework (<https://github.com/HancockLab/CVI>).  
57 Specifically, in the SHORE pipeline<sup>5</sup> we pre-processed the reference genome with the  
58 subprogram ‘preprocess’ and parameters < -C --indexes BWA,SuffixArray > and with bwa  
59 v0.7.5a<sup>6</sup>, command ‘index’, parameters < -a bwtsv >. We trimmed adapters with adapterremoval  
60 v2.1.2<sup>7</sup>, parameters < --trimns –trimqualities >. We aligned reads to the reference genome with  
61 the bwa program ‘aln’, parameters < -n 0.1 > and ‘sample’, parameter < -a 500 >, and we  
62 imported trimmed fastq files using the SHORE subprogram ‘import’ with parameters < --  
63 application genomic --importer Fastq --shore-filter --max-Ns 10% --lowcomplexity >. Finally,  
64 we called variants with the empirical scoring matrix approach implemented in the SHORE  
65 subprogram ‘consensus’ with parameters < -b 0.9 -g 4 -h 6 -i 0.5 -N >. We used this pipeline for  
66 all analyses except MSMC, GWAS and BSA. The second, more conservative pipeline is  
67 implemented as a custom program in java v.1.8, and it was used to reduce false positive variant  
68 calls due to indels for the MSMC analysis, which is sensitive to linked errors<sup>4</sup>. This pipeline

69 excludes repetitive genomic regions, such as regions where the same base is repeated five or  
70 more times, as well as the adjacent ten bases, it excludes the first and last positions of each read,  
71 it removes bases with quality < 30 and coverage < 5x, and it eliminates positions with coverage  
72 greater than twice the average coverage to remove potential duplications. For variant calling, the  
73 pipeline calls the reference allele with a calling ratio of 0.0 to 0.2, and a mismatch to the  
74 reference with a calling ratio of 0.8 to 1.0. To avoid strand-specific errors, mismatches are called  
75 only if they are supported by at least one read aligned on both the forward and reverse strand. To  
76 call short indels, we used a modified version of the GATKv.4.1.3.0<sup>8</sup> best practices workflow for  
77 germline short variant discovery and genotyping. We included biallelic variants only and  
78 converted heterozygous sites to missing data to mask possible false positives. Further, we  
79 converted genomic regions with coverage higher than twice the genomic average to missing data,  
80 to eliminate false variant calls due to duplications not represented in the reference genome. In the  
81 three pipelines, file conversions between fastq, bam and sam formats relied on picard v. 2.21.1  
82 and samtools v. 1.9<sup>9</sup>, vcf merging and subsetting relied on bcftools v1.9<sup>10</sup> and vcftools v. 0.1.14<sup>11</sup>.  
83 Average coverage across samples was 19.4x (range from 9.3x to 51.7x; Supplementary Data 1)  
84 after alignment to the reference.

85

86 For all downstream analyses, we retained variants with coverage greater than 3 and base  
87 quality greater than 25 in the SHORE calls, and 2 and 30 in the GATK calls  
88 (<https://github.com/HancockLab/CVI>). To call S-locus haplogroups we followed the procedure  
89 used in <sup>4</sup>. We added to the reference genome (TAIR10), which represents haplogroup A, the

90 sequences of S-locus haplogroups B and C (from Cvi-0<sup>12</sup> and Lz-0<sup>13</sup>, respectively). We called  
91 variants against this modified reference and assigned to each CVI sample the S-locus haplogroup  
92 that had the highest proportion of sites with non-zero coverage, after quality filtering.

93

## 94 **Supplementary Method 5. Plant growth and phenotyping**

95 In the flowering time experiment, we scored flowering time, bolting time, time to anthesis,  
96 number of days until the stem reached 3 cm, and the number of rosette leaves at bolting, as in  
97 Salomé *et al.*<sup>14</sup>. We measured correlation between the four flowering traits scored in the  
98 simulated CVI conditions experiment using the function `cor()` implemented in R  
99 (<https://github.com/HancockLab/CVI>). These phenotypes were strongly correlated, with  
100 Spearman's rho of at least 0.96 in Santo Antão and Morocco between flowering time and bolting  
101 time. In Fogo, where flowering time is more difficult to score due to differences in petal  
102 morphology, the correlation was somewhat lower (rho=0.83), likely due to increased error for the  
103 flowering time trait here. Therefore, bolting time results were used as a proxy for flowering time  
104 in downstream analyses.

105

## 106 **Supplementary Method 6. Linkage disequilibrium**

107 Linkage disequilibrium (LD) was assessed between pairs of SNPs with minor allele  
108 frequency greater than 5% were calculated using the command `< --ld-window 999 --ld-window-  
109 kb 10 --ld-window-r2 0 --r2 --snps-only >` in PLINK<sup>15</sup>. The numbers of sites on which LD was

110 estimated were 55, 645 for Santo Antão, 56, 173 for Fogo and 1, 435, 763 for Morocco.  
111 Calculations were made between pairs of SNPs up to a distance of 10 kb. LD decay analyses  
112 were conducted by division of marker pairs within the 10-kb region into bins of 1 kb and  $r^2$   
113 values within each bin were averaged. To visualize the result, the  $r^2$  values were sorted and  
114 plotted against the physical distance, using loess smoothing.

115

## 116 **Supplementary Method 7. Demographic reconstruction**

117 Using MSMC-CCR<sup>16</sup>, we inferred split times by computing the mean across combinations of  
118 sets of samples and the confidence interval of the mean ( $\pm 1.96$ \*standard error of the mean). For  
119 the split between Santo Antão and Fogo, we used a total of 63 combinations of eight accessions  
120 from each island. For the split to Morocco, we used 357 combinations (separately for the High  
121 Atlas, South and North Middle Atlas Moroccan populations). For splits within Santo Antão, we  
122 used 12 combinations to examine pairwise splits between the Figueira, Cova, Espongeiro, and  
123 Pico da Cruz populations. As suggested in <sup>16</sup>, we inferred split times when CCR reached 0.5,  
124 with an uncertainty interval between  $0.25 \leq \text{CCR} \leq 0.75$ .

125

126 For the inference of split parameters in dadi v.2.1.0<sup>17</sup>, we used joint site frequency spectra  
127 (JSFS) based on intergenic SNPs, which are less likely to evolve under strong selection than  
128 coding regions. We estimated parameters between the two Cape Verde islands and between CVI  
129 and Morocco using four demographic models: 1) a simple two-population split model with no

130 migration and constant population size ( $N_e$ ); 2) the same model with a bottleneck at the split; 3) a  
131 split with exponential changes in  $N_e$  after the split and no migration; and 4) an isolation with  
132 migration model (IM): a split with exponential changes in  $N_e$  and asymmetric migration.

133

134 For each demographic model and population pair, we replicated the analysis 1000 times with  
135 a maximum of 50 iterations. In each replicate run we used starting values for all parameters  
136 drawn randomly from predefined ranges. The parameter boundaries were ( $10^{-3} * N_{ref}$ ,  $20 * N_{ref}$ ) for  
137 effective population sizes ( $N_e$ ), (0;  $20 / N_{ref}$ ) for migration rate, and (0;  $10 * N_{ref}$ ) for the split time,  
138 where  $N_{ref}$  is the size of the ancestral population. Among the 1000 runs per model, we selected  
139 the parameter combination that resulted in the highest likelihood. We identified the model with  
140 the best support using the Akaike information criterion (AIC), and for each resulting best model,  
141 we calculated confidence intervals for parameters using 100 000 bootstrapped data sets and the  
142 Godambe Information Matrix implemented in dadi. For the best-supported models, the 5% runs  
143 with highest likelihood all converged to the same parameter set.

144

145 We inferred colonization time by obtaining an upper bound based on the minimum  
146 coalescence time between CVI and Morocco, and a lower bound based on the maximum  
147 coalescence time within the CVI clade. First, we ran coalescent simulations of the CVI-  
148 Moroccan split in msprime v.0.4.0<sup>18</sup> with split times drawn from a uniform distribution of times  
149 between 5-50 kya. To account for the confounding effect of purifying selection, which reduces  
150 the rate at which new mutations are introduced in the genome, we scaled mutation rate across



151 simulated genomic windows as  $\mu_{\text{scaled}} = \theta_{\text{local}} / 4 * N_e$ , where  $\theta_{\text{local}}$  was estimated as  $\theta_{\pi}$  in the  
152 Moroccan population within each window and  $N_e$  was fixed to the genome-wide average  
153 ( $N_e = \theta_{\text{genome}} / 4 * \mu$ ) so that  $\mu_{\text{scaled}} = \mu * (\theta_{\text{local}} / \theta_{\text{genome}})$ . Then, we inferred coalescence times between  
154 simulated and observed CVI and Moroccan genomes across genomic windows based on the  
155 density of mutations. We obtained 95% confidence intervals based on the standard error (SE)  
156 estimated by non-parametric bootstrap resampling of observed and simulated data. By fitting the  
157 simulated cumulative proportion of genomic windows with different inferred ages to observed  
158 data, we obtained a conservative estimate of the upper bound of colonization time. We inferred  
159 coalescence times within Cape Verde, across genomic windows (0.1 Mbp, non-overlapping),  
160 based on the density of mutations and used the 95<sup>th</sup> percentile as a lower bound for colonization  
161 time.

162

163 We constructed a time-calibrated chloroplast phylogeny to examine divergence in the  
164 chloroplast genome and to compare these to patterns at nuclear loci. First, we aligned the  
165 chloroplast sequences with outgroups from other *Arabidopsis* species, *Capsella grandiflora*,  
166 *Capsella bursa-pastoris* and *Camelina sativa*<sup>19</sup>, excluding the Inverted Repeat region. All indels  
167 were removed. Identical sequences were excluded from the alignment and a maximum likelihood  
168 (ML) phylogenetic tree was reconstructed with RAxML v.8.1.16<sup>20</sup> using the GTR+ $\Gamma$ +I model of  
169 rate heterogeneity and setting the clade of *Capsella* and *Camelina* as outgroup. Rapid  
170 bootstrapping followed by a thorough ML search was applied with 1000 bootstrap replicates.

171

172 Divergence time was estimated using BEAST v.1.8.3<sup>21</sup>. Three secondary calibration points  
173 were included from the literature<sup>22</sup>: the root height (split between genus *Arabidopsis* and the  
174 *Capsella/Camelina* clade) was set to 8.1627 million years (my), the split between *Capsella* and  
175 *Camelina* was set to 7.3572 my, and the crown age of genus *Arabidopsis* was set to 5.9685 my; a  
176 standard deviation of 1.0 was used for all three calibration points. The GTR+ $\Gamma$ +I model of rate  
177 heterogeneity with 4 Gamma categories was used as substitution model with an uncorrelated  
178 relaxed lognormal clock<sup>23</sup> and tree prior Speciation: Birth-Death Process<sup>24</sup>. Two independent  
179 MCMC runs with chain length  $1 \times 10^9$  were combined in LogCombiner v.1.8.3<sup>21</sup>, discarding the  
180 first 10% of each run as burn-in, and the median heights from the remaining 18002 trees were  
181 annotated onto the maximum clade credibility tree in TreeAnnotator v.1.8.3<sup>21</sup>.

182

### 183 **Supplementary Method 8. Additional inference of demography within CVI**

184 We used forward, individual-based simulations in SLiM v.3.3.2<sup>25</sup> to model the demographic  
185 history within the archipelago, including the colonization events and consequent bottlenecks.  
186 Under this model, the initial propagule founded a population on one island in the archipelago.  
187 The population grew following an exponential function that varies across simulations (growth  
188 rate varies with final size between 100 and 2500 individuals) until the time of the split between  
189 islands (4.0 kya), when the second island was colonized from the first. Both populations grew  
190 exponentially until they reached final  $N_e$  (10K, inferred from  $\theta_\pi$ ). On the second island, as  
191 inferred with *dadi*<sup>17</sup>, we simulated a 1000 year-long bottleneck with 400 individuals.

192

193 In order to determine which island was colonized first, we fit simulations to the observed  
194 data using the difference in the proportion of variants that are fixed in one island and segregating  
195 in the other (proportion of variants segregating in Santo Antão and fixed in Fogo minus the  
196 proportion of variants segregating in Fogo and fixed in Santo Antão) as a summary statistic. The  
197 value of this statistic is positive if Santo Antão was colonized first and negative if Fogo was  
198 colonized first. In addition, we used three-way (Morocco, Santo Antão, Fogo) JSFS modelling in  
199 *adi* to compare the relative fit of Santo Antão-first and Fogo-first models and estimated the  
200 length of the Fogo bottleneck period<sup>17</sup>. For each demographic model we replicated the analysis  
201 100 times with a maximum of 50 iterations. In each replicated run, we used starting values for all  
202 parameters drawn randomly from predefined ranges. The parameter boundaries were ( $10^{-3} * N_{ref}$ ;  
203  $20 * N_{ref}$ ) for effective population sizes ( $N_e$ ), and (0;  $10 * N_{ref}$ ) for split times, where  $N_{ref}$  is the size  
204 of the ancestral population. We identified the model with the best support using the Akaike  
205 information criterion (AIC).

206

## 207 **Supplementary Method 9. Niche modelling**

208 In the first step of niche modelling in MaxEnt<sup>26</sup>, we produced a predictive model using  
209 collection locations in Morocco and the bioclimatic variables described above and listed in  
210 Supplementary Data 2. We considered supplementing the collection locations with information  
211 from herbarium collection records from GBIF (<https://www.gbif.org>), but only ‘fuzzy matches’

212 existed in the data base and GPS coordinates were thus unreliable. We conducted climatic niche  
213 modelling in Morocco using occurrence data based on<sup>27</sup>. Data for the Moroccan region was  
214 extracted using the ‘extract by mask’ function in ArcToolbox. To avoid overfitting, climatic  
215 variables were pruned so that no two variables were correlated with Pearson correlation  
216 coefficient > 0.75. The model we present uses a set of variables chosen based on ecological and  
217 biological relevance, but the predicted suitability of CVI habitat for Moroccan accessions did not  
218 change across these different variable selection regimes. We ran a Maxent under the standard  
219 default parameters with jackknife resampling to estimate the importance of each variable on the  
220 model. Model fit was inferred based on the area under the curve (AUC) for the model output and  
221 a cross-validation approach in which the data were split into equal sized subsets. Then, we  
222 projected this model onto the CVI landscape to predict the suitable range of Moroccan samples  
223 in CVI. We further identified the regions within CVI that were most similar to the Moroccan *A.*  
224 *thaliana* habitat. Since the approach we used for pruning variables is somewhat subjective and  
225 the CVI suitability result was extreme, we also tried other approaches for pruning correlated  
226 variables but found no change in suitability in CVI across variable selection regimes including  
227 random selection of variables with Pearson’s  $r < 0.75$  and a variance inflation factor approach.  
228 This robustness is likely due to the fact that nearly all climate variable values for CVI lie outside  
229 those found in the Moroccan presence data.

230

## 231 **Supplementary Method 10. Testing for evidence of adaptive evolution**

232 To compute the  $d_{\text{sel}}/d_{\text{neu}}$  ratio, we used custom scripts written in java v.1.8  
233 (<https://github.com/HancockLab/CVI>) and defined it as the rate ratio of 0-fold non-synonymous  
234 to 4-fold synonymous substitutions, scaled by the number of sites at risk for each category as in  
235 the following equation.

$$236 \quad \frac{d_{\text{sel}}}{d_{\text{neu}}} = \frac{\frac{\text{number of 0-fold substitutions}}{\text{number of sites at risk for 0-fold substitutions}}}{\frac{\text{number of 4-fold substitutions}}{\text{number of sites at risk for 4-fold substitutions}}} \quad (1)$$

237 For this, we first constructed an artificial variant call format (VCF) file with all possible  
238 variants at all sites in the genome and annotated them with SnpEff v.3.0.7<sup>28</sup>. Then we used a  
239 custom script for the calculation of JSFS (<https://github.com/HancockLab/CVI>) to compute the  
240 number of zero- and four-fold degenerate substitutions, as proxies for selected and neutral sites,  
241 respectively. Note that this is a simplified approach to estimating dN/dS, which excludes 2- and  
242 3-fold degenerate sites. We used this approach because estimating the expected changes at these  
243 classes of sites is problematic due to asymmetries in substitution rates. We scaled these to the  
244 number of sites in the genome at risk for each substitution type and deducted the positions with  
245 more than 5% missing data. For continental clades, the spectra were polarized to *A. lyrata*  
246 samples. Due to the long divergence time and genomic rearrangements between species, the  
247 alignment of *A. lyrata* to *A. thaliana* reduced the number of bases for the analyses to 70676280.  
248 For the CVI populations, we defined substitutions as variants derived in comparison to Morocco,  
249 fixed in one island and absent from the other. To estimate uncertainty, we bootstrapped  
250 frequency spectra 500 times in polyDfe v.2.0<sup>29</sup> and calculated empirical  $p$ -values based on the  
251 bootstrapped data. The large variance in the bootstrapped data stems from the low number of

252 total variants fixed in the two island populations. If the number of four-fold substitutions was  
253 zero (in real or bootstrapped data), we conservatively added one to avoid dividing by zero. For  
254 the Moroccan clade, we used *Arabidopsis lyrata* samples as an outgroup. We used the spectra at  
255 zero- and four-fold degenerate sites to infer the distribution of fitness effects (DFE) and the  
256 proportion of adaptive substitutions (alpha) with polyDfe v.2.0<sup>29</sup> using default parameters <-m C  
257 -o bfgs>. We ran the analysis independently for the two CVI islands (11 samples in Fogo and 13  
258 in Santo Antão), and the four Moroccan clusters.

259

## 260 **Supplementary Method 11. Evidence for ongoing multi-variate adaptation in** 261 **Santo Antão**

262 Since its collection 37 years ago<sup>30</sup>, a single plant from CVI (Cvi-0) was studied extensively.  
263 Many mapping studies have used recombinant inbred line (RIL) populations (Cvi-0 x *Ler*-0 and  
264 Cvi-0 x Col-0)<sup>31,32</sup>, and near inbred introgression lines (NILs) of Cvi-0 into the *Ler*-0 genome<sup>33</sup>.  
265 The island of origin of Cvi-0 was previously unknown, but we found it clusters tightly with the  
266 Espongeiro population in Santo Antão, indicating that it was collected in this region  
267 (Supplementary Fig. 1). We conducted a literature review of studies that used the Cvi-0 x *Ler*-0  
268 RILs. We identified 47 QTL-mapping studies (Fig. 6a) that mapped 129 traits that we grouped  
269 into 23 major trait-categories. These studies localized 717 QTL intervals. Based on these studies  
270 and follow-up fine mapping, we compiled a set of 135 candidate genes<sup>49,14,31-62,62-102</sup>. In eleven  
271 cases, the actual mutation responsible for an effect on phenotype was found and validated (by

272 complementation tests, transgenics, sequence analyses). These variants include two large  
273 deletions, three small indels (frameshifts) and six SNPs (non-synonymous amino acid changes  
274 and truncating variants). To genotype large deletions in the natural population, we computed  
275 average coverage across 100 bp windows overlapping the deletions and flanking regions. The  
276 phenotypes affected by the functional variants range from flowering time and light signalling  
277 (FRI K232X<sup>86</sup>, CRY2 V367M<sup>84</sup>, GI L718F<sup>48,88</sup>), circadian clock regulation (ZTL P35T<sup>88</sup>),  
278 stomatal aperture (MPK12 G53R<sup>92</sup>), freezing tolerance (*CBF2* promoter deletion<sup>103</sup>), pathogen  
279 resistance (cPGK2 S78G<sup>104</sup> and *RPM1* whole gene deletion<sup>78</sup>), chloroplast morphology (FtsZ2-2  
280 G441fs<sup>87</sup>), fructose signalling (ANAC089 S224fs<sup>59</sup>), and innate immunity (FLS2 N452fs<sup>81</sup>). In  
281 one case, a functional variant responsible for copper detoxification was identified (HMA5  
282 N923T<sup>56</sup>), but it likely arose in Cvi-0 in the laboratory, since it is completely absent from the  
283 sampled natural population.

284

285 To assess the effects of the seven functional variants segregating in Santo Antão on fitness,  
286 we used forward-backward stepwise regression (i.e., sequential replacement) approach in a linear  
287 model framework using the R package *caret* v.6.0-86<sup>105</sup>. For the forward case, we started with a  
288 model with no predictors (only an intercept), iteratively added functional variant predictors, and  
289 stopped when the improvement was no longer statistically significant based on the change in root  
290 mean squared error (RMSE). For the backward case, modelling started with the full model  
291 (intercept plus all functional variants), iteratively removed the predictors that contributed the

292 least, and stopped when all predictors were statistically significant. Significance of models was  
293 assessed based on the root mean squared error (RMSE), by bootstrap resampling (1000 times).

294

295 To test whether the explanatory power of the seven functional variants was higher than  
296 randomly selected genomic variants, we resampled 2000 sets of seven randomly chosen variants  
297 from an LD-pruned genome (PLINK<sup>15</sup> command: <--indep-pairwise 50 10 0.1>) and conducted  
298 stepwise regression on each of these sets, exactly as we had done on the seven functional  
299 variants. We calculated the model  $R^2$  to produce a null distribution and obtained an empirical  $p$ -  
300 value by comparing the observed  $R^2$  value to this using the formula:  $(1 + \sum(s \geq s_0)) / (N + 1)$ ,  
301 where  $s$  is the  $R^2$  value per draw,  $s_0$  the observed  $R^2$  value, and  $N$  the number of draws  
302 (<https://github.com/HancockLab>).

303

## 304 **Supplementary Method 12. Trait mapping**

305 To assess flowering time segregation in Cape Verde, we generated three inter-island F2  
306 populations (S5-10 x F13-8 (n=488), S15-3 x F3-2 (n=636), and Cvi-0 x F9-2 (n=598)). These  
307 were grown in Bronson climatic growth chambers, with settings to match CVI conditions: 20°C  
308 during the day and 14°C at night, with a 12h photoperiod and 70% humidity. We scored bolting  
309 and flowering time in all F2 individuals and 12 replicates per parental line, except for Cvi-0 and  
310 F9-2, for which only four replicates were grown.

311



312 To determine whether there was transgressive segregation in each of these populations  
313 against their corresponding parental lines, we used the *DunnettTest()* function implemented in  
314 the R package *DescTools* v.0.99.37<sup>106</sup>. We used Fisher's method<sup>107</sup> to calculate a combined *p*-  
315 value across the set of crosses, using the function *fisher.method()* implemented in the R package  
316 *metaseqR* v.1.26.0<sup>108</sup> (<https://github.com/HancockLab/CVI>).

317

318 Bulked segregant analysis was done in an inter-island F2 population (S5-10 x F13-8, n=488),  
319 in which the ancestral allele FRI K232 was fixed), grown under simulated CVI conditions.  
320 Because early flowering segregated at approximately a 1:3 ratio (indicating a single recessive  
321 locus), we sampled leaf tissue from the 25% early tail of the F2 (n=108). We extracted DNA  
322 using a DNeasy Plant Mini kit (Qiagen), assessed DNA quality and quantity with Qubit and  
323 Nanodrop (Thermo Fisher Scientific), prepared a single library using NEBNext Ultra II FS DNA  
324 Library Prep Kit (New England Biolabs) and sequenced it to 50x coverage using the Illumina  
325 HiSeq3000 platform. We called variants against the TAIR10 reference assembly using a GATK  
326 pipeline<sup>8</sup> (<https://github.com/HancockLab/CVI>), retaining only biallelic variants. We identified  
327 window(s) where the median allele frequency was greater than 95% and annotated variants  
328 within candidate region(s) using SnpEff v.3.0<sup>28</sup>.

329

### 330 **Supplementary Method 13. *FLC* RNA quantification**

331 We measured *FLC* expression in a representative set of eight Cape Verdean, and six  
332 Moroccan accessions. We also measured *FLC* expression in the Col-0 reference strain, as well as  
333 a modified Col-0 with a functional *FRI* introgressed (Col-0 *FRI*-Sf2, shown as Col-0 *FRI*<sup>+</sup>*FLC*<sup>+</sup>),  
334 since *FRI* affects *FLC* mRNA levels<sup>109,110</sup>, and Col-0 *FRI*-Sf2 with an *FLC* knock-out (Col-0  
335 *FRI*-Sf2 *flc-3*, shown as Col-0 *FRI*<sup>+</sup>*FLC*<sup>-</sup>)<sup>111</sup>. We grew three replicates of each genotype under  
336 CVI simulated conditions (12h light, 20°C day, 14°C night). We collected and immediately froze  
337 2-3 rosette leaves each from 2-week-old plants and ground them with the TissueLyser II  
338 (Qiagen). We extracted RNA with TRIzol (Invitrogen) and treated 2µg with the DNA-free DNA  
339 Removal Kit (Invitrogen) for 1h at 37°C. We generated cDNA using the Superscript II reverse  
340 transcriptase (Invitrogen) together with oligo(dT) primer for 2h at 42°C. We assessed mRNA  
341 levels by qRT-PCR on a LightCycler 480 instrument (Roche) with the EvaGreen dye (Biotium)  
342 using the 2<sup>-ΔΔCt</sup> method (Applied Biosystems) and *PP2A* (AT1G13320) as a reference gene.  
343 Primers used in this experiment are listed in Supplementary Table 9. Differences in *FLC*  
344 expression between genotypes were tested with the Kruskal-Wallis method implemented in the R  
345 package *agricolae* v.1.3-2<sup>112</sup> (<https://github.com/HancockLab/CVI>).

346

#### 347 **Supplementary Method 14. *FLC* complementation test**

348 We performed genetic complementation tests for *FLC* by crossing four individuals from  
349 Fogo (each with the *FLC* 3X allele) to Col-0 *FRI*-Sf2 plants with and without a functional *FLC*  
350 allele (Col-0 *FRI*-Sf2, referred to as Col-0 *FRI*<sup>+</sup>*FLC*<sup>+</sup>, and Col-0 *FRI*-Sf2 *flc-3*<sup>111</sup>, referred to as  
351 Col-0 *FRI*<sup>+</sup>*FLC*<sup>-</sup>, respectively). We also crossed the mutants (Col-0 background) to obtain a

352 heterozygous F1 at *FLC*. We grew four replicates of each parent and F1 per cross and scored  
353 bolting and flowering time in 12h standard greenhouse conditions.

354

## 355 **Supplementary Method 15. Historical reconstruction of evolution of *FRI* and** 356 ***FLC* loci and fit to models of adaptation**

357 We used RELATE v1.1.4<sup>113</sup> to infer the genealogical trees for the derived alleles FRI 232X  
358 (Chr4:269719) and FLC 3X (Chr5:3179333). We used bcftools v1.9<sup>114</sup> to filter the VCF file for  
359 quality, removed non-biallelic SNPs, retained segregating sites, and filtered out missing data  
360 with the following execution `<bcftools view -m2 -M2 -v snps --min-ac=1 -i 'MIN(FMT/DP)>3`  
361 `& MIN(FMT/GQ)>25 & F_MISSING=0'>`. For FLC 3X, because the derived allele is fixed in  
362 Fogo, we included S1-1 from Lombo de Figueira, Santo Antão, as the outgroup. Within  
363 RELATE, we used the command `RelateFileFormats` (using `--mode ConvertFromVcf`) to convert  
364 the VCF file into haplotype and sample files. To infer the genome-wide genealogies, we first ran  
365 the command `Relate` (using `--mode All`) per chromosome and defined parameters of the  
366 recombination map (`--map`), mutation rate (`--m`), and the coalescence file (`--coal`) for  $N_e$  over  
367 time. The estimated mutation rate ( $7 \times 10^{-9}$ ) for *A. thaliana*<sup>115</sup> was corrected for the percentage of  
368 missing data for each region and `-m` set to  $2.512 \times 10^{-9}$  for FRI 232X and  $2.1 \times 10^{-9}$  for FLC 3X.  
369 We used a published recombination map<sup>116</sup> corrected for the estimated outcrossing rate of 5%  
370 estimated in natural populations<sup>117</sup> by dividing the genetic distances by 20. We then used the  
371 output to estimate coalescence rates using the script `EstimatePopulationSize.sh` across all 5

372 chromosomes with generation time set to one year, running the algorithm for 10 iterations. To  
373 obtain 95% confidence intervals for RELATE-inferred coalescence rates, we used genome-wide  
374 genealogies and coalescence rates as inputs into the COLATE package<sup>118</sup>  
375 (<https://github.com/leospeidel/Colate>), which uses a block bootstrap (100x) over genomic regions.

376

377 To infer the local genealogies for FRI 232X and FLC 3X, we ran RELATE and used the  
378 genome-wide coalescence rates (--coal) inferred previously. To produce genealogical trees for  
379 FRI 232X and FLC 3X variants with confidence intervals for the estimated ages based on 200  
380 samples from the MCMC (derived using SampleBranchLengths.sh --format a, and using default  
381 settings), we used the script TreeViewSample.sh, with 10\*N steps (N is the number of  
382 haplotypes) and 1000 burn-in iterations.

383

384 We used CLUES<sup>119</sup> to infer the frequency trajectory and selection coefficient for the derived  
385 FRI 232X (Chr4:269719) and FLC 3X (Chr5: 3179333) alleles. CLUES uses importance  
386 sampling over trees generated in RELATE to produce a posterior distribution of trees from  
387 which a frequency trajectory can be inferred. From the output from RELATE, we used the  
388 command `<./SampleBranchLengths.sh --format b>` to obtain 200 samples from the MCMC. For  
389 FRI 232X, we integrated a pseudo-ancestor individual (from our inferred CVI ancestral states) as  
390 an outgroup for the Santo Antão population. Then, we inferred genome-wide and local  
391 genealogies and conducted importance sampling in RELATE after adjusting mutation rate (-m)  
392 to  $3.24 \times 10^{-10}$  and  $4.193 \times 10^{-10}$  based on the proportion of missing data removed for the *FRI* and

393 *FLC* regions, respectively. We obtained estimates of the posterior distributions of allele  
394 frequencies over time using a recessive model (--dom 0): <inference.py --popFreq 0.7513 --  
395 tCutoff 5000 --coal relate.popsiz.e.coal --sMax 1 --df 100 --dom 0 > for FRI 232X, and  
396 <inference.py --popFreq 0.99 --tCutoff 7000 --coal relate.popsiz.e.coal --sMax 1 --df 100 --dom 0  
397 > for FLC 3X (<https://github.com/HancockLab/CVI>). As in other analyses, we assumed one  
398 generation per year. We inferred selection coefficients jointly across two-time bins (epochs) for  
399 FRI 232X (0-2 and 2-4 kya) and three-time bins for FLC 3X (0-2, 2-4 and 4-6 kya) between the  
400 present day and the time in the past when the variants arose.

401

402 We calculated the fit to strong selection weak mutation (SSWM) and weak selection strong  
403 mutation (WSSM) models of evolution<sup>120–122</sup> using an estimate of the genome-wide mutational  
404 target size based on molecular studies<sup>109,123–126</sup> and inferences from our population genetic  
405 analyses. The logic and details can be found in the Supplementary Notes.

406

407 We conducted forward simulations in SLiM<sup>25</sup> under a Wright-Fisher model based on  
408 parameter estimates from the Fogo population to examine the probabilities of fixation of an  
409 adaptive variant (i.e., one that abolishes the vernalization requirement for flowering) taking into  
410 account the stochastic effects of drift. The (constant) population size was set to  $N=48$  based on  
411 the estimate from RELATE and the selection coefficient was set to  $s = 0.09273$  based on the  
412 estimate from CLUES under a model where the reconstructed  $N_e$  was used in RELATE/CLUES.  
413 The final number of generations depended on when the variant fixed with a maximum of 6000

414 generations. We simulated two genomic elements: one of size 1.5 Mbp where neutral mutations  
415 could arise and another of 1 bp where the selected variant could arise. We used three different  
416 plausible estimates for the degree of selfing (90%, 95% and 99%) based on estimates from  
417 natural population<sup>117</sup> and conducted 200 simulations for each case. From these, we calculated the  
418 proportion of runs where populations adapted, the proportions of potentially adaptive variants  
419 that are lost or fixed in all runs, and the times to fixation or loss.

420

## 421 **Supplementary Note 1. Population history reconstruction**

422 We used Chromopainter<sup>127</sup> to identify the closest ancestor to CVI across the genome by  
423 matching haplotypes to sequenced African and European individuals<sup>4,128</sup>. We found that the  
424 Moroccan High Atlas population was the closest relative for the majority of the genome (approx.  
425 61%), followed by the North Middle Atlas population (approx. 7%) and then other Moroccan  
426 and European populations (Supplementary Fig. 4). Some of the variance visible in  
427 Supplementary Fig. 4 matching across populations may be due to the lack of a strong (close)  
428 match, so that multiple nearly equivalent distant matches can be often found. We next examined  
429 two specific large-scale loci (the chloroplast and the S-locus), where interpretation of ancestral  
430 sharing may be simpler due to the very low probability of recombination at these loci. At the  
431 chloroplast, we found that Cvi-0 clusters most closely with individuals from the South Middle  
432 Atlas population (Supplementary Fig. 4-5).

433

434 The S-locus is a well-characterized region responsible for self-incompatibility in *A. thaliana*.  
435 In the species, three deeply diverged haplogroups segregate (A, B, C) as well as an ancient  
436 recombinant (A/C) haplotype<sup>129–131</sup>. Due to the deep divergence between the major haplogroups,  
437 recombination between these is suppressed and thus exceedingly rare in this region<sup>132</sup> so that  
438 matching to major haplogroups is clear. We classified S-locus haplogroups in all CVI samples  
439 following <sup>4</sup> and found that they all carried haplogroup B (Supplementary Fig. 4). In the  
440 continental sample, this haplogroup is present only in three samples and only in the northernmost  
441 Moroccan population in the Rif Mountains<sup>4,133</sup>.

442

443 Taken together, these patterns show that while Morocco is the continental population  
444 genetically closest to CVI, there is no single Moroccan sample or population that is consistently  
445 closest to CVI across the genome. Instead, our findings suggest that CVI was colonized by a  
446 ‘ghost’ population that is not represented well by any modern-day sampled population.

447

448 Previously, based on the timing of coalescence events, we inferred that Moroccan  
449 populations expanded and contracted over time<sup>4</sup>. This could have led to loss and/or re-sorting of  
450 lineages among populations and could help to explain why we were unable to identify a single  
451 best representative of the colonizing population<sup>4</sup>.

452

453 Next, we narrowed down the CVI colonization time by obtaining an upper bound based on  
454 the minimum coalescence time between CVI and Morocco and a lower bound based on the  
455 maximum coalescence time within the CVI clade.

456

457 To estimate the split time between Moroccan and CVI populations, and therefore the upper  
458 bound of colonization time, we calculated the relative ratio of between-group coalescence events  
459 to within-group coalescences (i.e., the cross-coalescence rate (CCR) statistic) implemented in  
460 MSMC<sup>16,134</sup>. Given that we are unable to identify the closest Moroccan population, we expected  
461 this analysis to overestimate the divergence time from the actual continental ancestor. The CVI  
462 population exhibited initial divergence from all present-day Moroccan populations at  
463 approximately 40-60 kya (Supplementary Fig. 7), which we interpret to represent the split time  
464 between the present-day Moroccan population and the ‘ghost’ ancestor of the CVI populations.

465

466 CCR between CVI and High Atlas shows a somewhat different pattern compared to other  
467 Moroccan populations. The trajectory of the statistic does not monotonically decay as would be  
468 expected under a simple split model but rather inflects and reaches a local maximum between 10  
469 and 20 kya (Supplementary Fig. 7). As a result, the 0.25 - 0.75 CCR quantiles for the CVI-High  
470 Atlas split are consistent with a wide range of split times from 60 kya until as recently as 10 kya.  
471 This inflection could potentially be explained by a complex relationship between the ancestors of  
472 the Moroccan and CVI lineages, i.e., secondary contact between the ancestors of the ‘ghost’ and



473 the High Atlas populations. This resulted in the presence of some haplotypes across the High  
474 Atlas genomes that represent the population that originally colonized CVI.

475

476 Although we were unable to identify a close outgroup population to CVI, we can use  
477 information about the coalescences within CVI to obtain a lower bound on the colonization time.  
478 We examined historical coalescence events in Santo Antão, Fogo and between the two islands  
479 based on haplotype coalescences. Coalescence rates spike around 10 kya (Supplementary Fig. 7)  
480 and decline sharply in Santo Antão starting at approximately 7 kya, when we infer population  
481 structure begins to develop within this island (Supplementary Fig. 8d). In agreement with this  
482 time estimate, and based on the density of mutations, 95% of genomic windows between islands  
483 (0.1 Mb, non-overlapping) coalesced by 7.1 kya (Supplementary Fig. 8b). Then, at  
484 approximately 4-5 kya, there is a strong signature of reduced coalescence between islands,  
485 consistent with a split at this time (Supplementary Fig. 8d).

486

487 The long gap between the coalescence of lineages within CVI (5-7 kya) and the coalescence  
488 times between present-day Moroccan and CVI populations (40-60 kya) is consistent with a  
489 model in which a now extinct or unsampled ‘ghost’ population was the actual founding  
490 population of CVI. Based on our analyses, we hypothesize that this population split from the  
491 present-day Moroccan population approximately 35-50 kya (Supplementary Fig. 7) and that  
492 island colonization likely occurred approximately 7 kya, when population structure becomes  
493 apparent in CVI (Supplementary Fig. 7).

494

495 To further explore the colonization dynamics and to assess evidence for colonization by a  
496 ‘ghost’ population in different time frames, we compared the distribution of ages of genomic  
497 windows (haplotypes) to those from simulations of a ‘ghost’-CVI split at different time points (5,  
498 10, 20, 30, 40 and 50 kya). These simulations were conducted under the assumption that variable  
499 mutation rate and purifying selection reduce diversity by the same extent as divergence (the same  
500 rationale as in the HKA test) and allow for testing for secondary contact between the ancestors of  
501 the Moroccan and ‘ghost’ populations. In that way, we were able to capture the genomic  
502 variance in the combined  $N_e\mu$  parameter by scaling the simulations to diversity in Morocco  
503 across genomic regions. This approach was based on the logic that the inflection in the MSMC-  
504 CCR plot (Supplementary Fig. 7) could be due to secondary contact between the ‘ghost’  
505 population and the Moroccan population (i.e., gene flow back into the Moroccan population from  
506 the ‘ghost’). In this case, we could use the distribution of window ages (inferred based on the  
507 density of SNP variants) to estimate the timing of the secondary contact event. This timing  
508 inference would better represent the split between CVI and the ‘ghost’, although it is still likely  
509 to be an overestimate. We found that the cumulative tail of recent coalescence times in observed  
510 data fits best with a 10 ky old split and upper bound of colonization time (Supplementary Fig. 7).

511

512 The site frequency spectrum provides complementary (largely independent) information  
513 from signatures of haplotype coalescences. We ran *dadi* to infer the split time between Morocco  
514 and the ancestor of the CVI population. We used five demographic models including 1) a simple

515 split model, 2) a model that included an exponential population size change in CVI after the split,  
516 3) an isolation-with-migration model, 4) a model that included a bottleneck in CVI after the split,  
517 followed by an instantaneous size change, and 5) a model that included bottlenecks in both the  
518 CVI and Moroccan populations after the split and a subsequent size change in CVI. Details of  
519 the model parameters are shown in Supplementary Fig. 7. The best performing model (based on  
520 AIC) is the two-bottleneck model. This model includes a bottleneck in CVI after the split,  
521 followed by an instantaneous population increase (Supplementary Fig. 7). Similar to the  
522 haplotype coalescence analysis, the parameter estimates under this JSFS-based model capture the  
523 signal of an early split between the ancestor of the CVI colonist ('ghost' population) and the  
524 ancestor of the current Moroccan population, placing this split time at 49.7 kya, with a 43.5 kya  
525 bottleneck. This scenario fits well with the inferences from haplotype coalescence times  
526 (Supplementary Fig. 7) where the long-term effective population size of the 'ghost' population  
527 was small in the interval between the split of the parental populations and expansion within CVI.  
528 In the JSFS-based model, the time when the CVI population is inferred to increase in size (6 kya)  
529 is consistent with an expansion beginning sometime after the colonization of the islands  
530 (Supplementary Fig. 7d-e). Neither the haplotype coalescence approach nor the JSFS approach  
531 between Morocco and CVI can reveal specific information about the propagule size to CVI due  
532 to confounding with the 'ghost' population. However, the very low number of shared variants  
533 between present-day Moroccan populations and CVI (0.1%) suggests that the colonizing  
534 population was depleted of variation and that current trait variation in the islands occurred via  
535 new variants.

536

537       Next, we wanted to determine the order of island colonization. Isolation by distance leads to  
538 a reduction in variation with distance from the starting population and to a pattern in which a  
539 proportion of derived variants that segregate in one (parent) population will be fixed in the child  
540 population<sup>135,136</sup>. Therefore, we focused on the subset of variants that are segregating in one  
541 island and fixed derived in the other to infer colonization order. First, we examined our power  
542 for this approach using simulations. Here, we found that as long as the time between the  
543 colonization of the first and second island, or the size of the island colonized first is large enough  
544 (larger than approximately 500 individuals at the split), the island colonized first will have a  
545 lower proportion of fixed mutations that segregate in the other island, independent of the number  
546 of colonizers. In the observed data, the Fogo population has a higher proportion of fixed  
547 mutations that segregate in Santo Antão compared to the converse (a positive statistic in  
548 Supplementary Fig. 8c), supporting initial colonization of Santo Antão, followed by Fogo (from  
549 Santo Antão). When we fit the statistic estimated from data to forward simulations, we inferred  
550 that population size in Santo Antão grew quite slowly from colonization until the split from  
551 Fogo, with a final size of only about 1000 plants when Fogo was colonized.

552

553       Further, we used *dadi*<sup>17</sup> to fit three-population models to the observed joint site frequency  
554 spectra. The models were simple 3-populations splits with constant population sizes, but they  
555 differed in which island was colonized first. In the first model, Santo Antão was colonized from  
556 Morocco, and later Fogo was colonized from Santo Antão. In the second model, Fogo was

557 colonized from Morocco, and later Santo Antão was colonized from Fogo. The model that best  
558 fit observed data (lowest AIC, 612 vs 628; highest likelihood, -301.3 vs -309.1) was the one in  
559 which Santo Antão was colonized first from Morocco, and Fogo was colonized later from Santo  
560 Antão.

561

562 Next we inferred the split time between islands and other aspects of historical population  
563 dynamics using the JSFS (dadi<sup>17</sup>). We estimated parameters under a range of models (simple  
564 split, exponential, isolation with migration, bottleneck) and compared model AICs to identify the  
565 best fitting model of the historical dynamics of the Fogo population. We found that the best  
566 model was one in which the island colonization event was accompanied by a bottleneck lasting  
567 930 years. The population size ( $N_e$ ) during the bottleneck period was approximately 400  
568 individuals (Supplementary Fig. 8a, Supplementary Table 3). We did not attempt to estimate the  
569 number of founders separately from the bottleneck size because diffusion models generally do  
570 not perform well, such as dadi, generally does not perform well to infer the  $N_e$  before a  
571 bottleneck<sup>17</sup>.

572

573 The estimated split time is in rough agreement with a simpler estimate based on the  
574 distribution of pairwise differences across windows within and between islands (Supplementary  
575 Fig. 8b). We calculated the mean pairwise differences among CVI individuals across 100 kb  
576 windows of the genome and found that coalescence time between islands was centred around 4.5  
577 kya (mean: 4.6 kya median: 4.5 kya) and that 95% of the windows coalesced by 7.1 kya. The

578 complete distribution of pairwise differences is shown in Supplementary Fig. 8b. Variation  
579 within Santo Antão was centred around 3.0 kya (mean: 3.0 kya; median: 3.0 kya) with 95% of  
580 windows coalescing by 4.8 kya and in Fogo around 2.4 kya (mean: 2.5; median: 2.4) with 95%  
581 of windows coalescing by 3.9 kya.

582

583 The bottleneck duration ( $T_s$ ) agrees with a simple calculation based on the proportion of  
584 fixed variants in Fogo. The Fogo population carries 135 fixed derived mutations out of a total of  
585 23 Mbp of sequence. Using  $T_s = \text{number of fixed mutations}/(\mu * L)$ , we can estimate about 840  
586 generations, in which Fogo remained a single connected population (about 840 years) after  
587 colonization before structure built up preventing mutations from fixing in the island. The same  
588 calculation based on intergenic sites only, results in a very similar bottleneck duration (36 fixed  
589 derived intergenic mutations out of 4.8 Mbp: about 1070 years).

590

591 The complete lack of population structure for approximately 870-1070 years for the Fogo  
592 population is striking. Seed-dispersed plant populations tend to be highly structured<sup>137</sup> including  
593 *A. thaliana* populations<sup>138-141</sup>. However, we find no evidence of structure accumulating in the  
594 long post-colonization bottleneck period in Fogo. This implies that the nascent population was  
595 poorly adapted to its new environment and therefore severely limited in size during this waiting  
596 period until one or more necessary mutations arose that increased fitness and allowed the  
597 population to expand.

598

599       Secondary migration events after initial colonization are unlikely. Allowing for migration  
600 (gene flow) between the Moroccan and ‘ghost’ populations after the split led to a poor model fit  
601 (based on AIC; Supplementary Fig. 7), implying a lack of migration after the split. This is not  
602 surprising given that multiple independent migration events into CVI would likely lead to much  
603 higher genetic variation than we observe in the archipelago. The average pairwise differences  
604 between two Moroccan individuals is 82.4-fold higher relative to the average pairwise  
605 differences within CVI ( $\theta_{\pi}$  (Morocco) =  $5.38 \times 10^{-3}$ ;  $\theta_{\pi}$  (CVI) =  $6.53 \times 10^{-5}$ ). Even within a single  
606 Moroccan region, the average pairwise differences is 54.2-fold higher than in CVI (on average  $\theta_{\pi}$   
607 (Moroccan regions) =  $3.54 \times 10^{-3}$ ; Supplementary Table 1). Further, we observed extremely low  
608 sharing of variation between CVI and Morocco (0.1%). Based on this, it is difficult to imagine a  
609 scenario in which multiple independent dispersal events could have contributed to the present  
610 CVI populations.

611

612       Similarly, given the almost complete lack of shared variants genome-wide between Santo  
613 Antão and Fogo (0.6%), it is highly unlikely there was any subsequent migration after the initial  
614 colonization of Fogo. In further support of this assertion, a single chloroplast haplotype is fixed  
615 in CVI, with only 18 variants segregating there. Similar to clustering from genomic variation, a  
616 chloroplast network clearly separates the two islands (Supplementary Fig. 6). Consistent with the  
617 lack of secondary migration between islands, demographic inference with *dadi* finds the best

618 support for a model with no migration (Supplementary Fig. 8c-d). Further, given the inferred  
619 small initial population size in Fogo, a secondary migration event from Santo Antão would likely  
620 result in much higher shared variation between islands than observed.

621

## 622 **Supplementary Note 2. Population history within islands**

623 Trajectories of coalescence rates within Santo Antão and Fogo (MSMC) as well as matching  
624 to patterns of polymorphism in simulations (Supplementary Fig. 8d) imply that Santo Antão was  
625 colonized first and Fogo second from Santo Antão. Trajectories of coalescence rates over time  
626 for individual Santo Antão populations and inferred split times with MSMC-CCR show that the  
627 Cova de Paúl population best represents the early colonists (Supplementary Fig. 8d). Based on  
628 CCR analysis, we estimated that Cova de Paúl split from Lombo de Figueira at approximately 7  
629 kya. At this time, the coalescence (MSMC) trajectory for Santo Antão enters a period of intense  
630 reduction (Supplementary Fig. 7b), which likely corresponds to the formation of population  
631 structure as *Arabidopsis* expanded its range. The most recent population splits are between  
632 Espongeiro and Pico da Cruz. In Fogo, the more arid island, we found evidence for a bottleneck  
633 that lasted approximately 930 years after colonization (Supplementary Fig. 8a, Supplementary  
634 Table 3). Once the population did begin to expand in Fogo, it dispersed to three regions (Monte  
635 Velha, Inferno and Lava) and structure developed among these.

636



637 **Supplementary Note 3. Niche modelling to predict suitability of Cape Verde**  
638 **habitat based on Moroccan distribution**

639 The variables in the final Maxent model were the length of the growing season,  
640 isothermality, maximum temperature of the warmest month, minimum temperature of the coldest  
641 month, temperature annual range, mean temperature of the wettest quarter and precipitation  
642 seasonality. When we projected the Moroccan niche model onto the Cape Verde archipelago, we  
643 found that there was no habitat predicted to be suitable for colonization from Morocco. As is  
644 generally the case in niche modelling, correlations between environmental variables across the  
645 range result in alternative possible models. The model we present uses a set of variables chosen  
646 based on ecological and biological relevance. However, predicted suitability of CVI habitat for  
647 Moroccan accessions did not change across different variable selection regimes: none predicted  
648 suitable habitat for Moroccan *A. thaliana* establishment in CVI. This is likely due to the fact that  
649 the climate variable values for CVI lie outside or nearly outside the distribution of most  
650 Moroccan climatic variables. As a result, the predicted (dis-)similarity may be more informative,  
651 which shows that much of Santo Antão and a band around the highest altitude Bordeira region of  
652 Fogo has the highest predicted similarity. These most similar regions encompass locations where  
653 we found populations of *Arabidopsis* in CVI.

654

655 **Supplementary Note 4. Evidence of positive selection in CVI**

656 We computed the relative rate of fixation of 0-fold non-synonymous to 4-fold synonymous  
657 variants ( $d_{\text{sel}}/d_{\text{neu}}$ ) for the Moroccan and CVI lineages. In the absence of selection  $d_{\text{sel}}/d_{\text{neu}}=1$ , as  
658 non-synonymous and synonymous mutation have the same probability to arise and fix. Purifying  
659 selection reduces the probability of fixation of non-synonymous mutations resulting in  $0 \leq$   
660  $d_{\text{sel}}/d_{\text{neu}} < 1$ . A relaxation of purifying selection will move the  $d_{\text{sel}}/d_{\text{neu}}$  ratio from  $0 \leq d_{\text{sel}}/d_{\text{neu}} < 1$   
661 towards neutrality,  $d_{\text{sel}}/d_{\text{neu}}=1$ . Positive selection is in principle the only force that can result in  
662 higher substitution rates of functional compared to neutral mutations, resulting in  $d_{\text{sel}}/d_{\text{neu}} > 1$ .  
663 However, multiple forces are likely to be acting at any one time across loci in the genome, so  
664 that the observed  $d_{\text{sel}}/d_{\text{neu}}$  is expected to represent a composite of the neutral evolution, purifying  
665 selection and adaptive evolution. Therefore,  $d_{\text{sel}}/d_{\text{neu}} > 1$  implies that there are many  
666 advantageous mutations fixed on the branch leading to the clade.

667

668 Consistent with the large-scale effect of purifying selection in continental *A. thaliana*, the  
669  $d_{\text{sel}}/d_{\text{neu}}$  ratio in Morocco, polarized to *A. lyrata*, is 0.18 (Fig. 5a). For Santo Antão and Fogo, we  
670 analysed the long branch of divergence from the continents, on which mutations are found fixed  
671 derived in CVI as a whole, as well as the two short branches separating the two islands, where  
672 mutations are fixed derived in one or the other island. The long branch of divergence mainly  
673 represents the continental history in the ‘ghost’ population but it is also confounded with the  
674 early history in CVI after colonization. In this case, we obtained a  $d_{\text{sel}}/d_{\text{neu}}$  ratio of 0.276, slightly  
675 higher than the Moroccan population. Then we examined the short branches separating the two

676 islands, which correspond to the past 4-10 ky of evolution in isolation within Santo Antão and  
677 Fogo. In this case the genome-wide  $d_{\text{sel}}/d_{\text{neu}}$  ratios (Santo Antão:  $d_{\text{sel}}/d_{\text{neu}}=2.2$ , Fogo:  
678  $d_{\text{sel}}/d_{\text{neu}}=1.7$ ) are much higher than for the Moroccan population and also higher than unity,  
679 consistent with strong positive selection acting across the genomes of the island populations. Due  
680 to the very shallow history within each island, few mutations had the time to arise and fix in each  
681 functional category; as a consequence, confidence intervals around these estimates are  
682 necessarily high, but nonetheless consistent with exceptionally high  $d_{\text{sel}}/d_{\text{neu}}$  values in CVI. To  
683 further investigate these patterns, we used the software polyDfe<sup>29</sup> to estimate the statistic alpha,  
684 the proportion of non-synonymous substitutions driven by positive selection or linked to  
685 positively selected alleles. Consistent with the high  $d_{\text{sel}}/d_{\text{neu}}$  ratio, we estimate that in Santo  
686 Antão 70.7% and in Fogo 62.8% of non-synonymous substitutions were driven to fixation by  
687 positive selection or by linkage to positively selected alleles.

688

689        Additionally, we estimated the distribution of fitness effects (DFE) of variants segregating in  
690 the CVI and Moroccan populations with polyDfe<sup>29</sup>. The DFE in the two Cape Verde islands are  
691 enriched both in neutral and slightly deleterious variants (-1, 0 category), as well as in variants of  
692 large positive effects on fitness (all positive categories) compared to Moroccan populations (Fig.  
693 5b). This is consistent with a reduction in efficiency of purifying selection relative to the  
694 continent combined with strong positive selection in response to the novel CVI environment. The  
695 two islands differ somewhat in the inferred parameters of positive selection. In Santo Antão, the  
696 percentage of variants estimated to have a positive effect on fitness ( $p_b$ ) was 2.9%, with an

697 average effect of  $S_b = 54.7$ . In Fogo, the percentage of beneficial variants was greater,  $p_b =$   
698 19.7%, but with a smaller average inferred effect on fitness,  $S_b = 6.8$ .

699

## 700 **Supplementary Note 5. Parallel adaptation by reduced time to flowering**

701 We mapped flowering time in Santo Antão using GWAS, with a linear mixed model (LMM)  
702 that controls for population stratification<sup>142</sup>. We used the median per genotype across replicates  
703 as phenotype, since no block effect was detected in the simulated CVI conditions experiment  
704 (Supplementary Fig. 9). All typed variants in the genome explained 99.997% of the observed  
705 phenotypic variance (PVE; also known as ‘chip heritability’ or ‘SNP heritability’) and we  
706 identified one clear genome-wide significant peak on top of chromosome 4. This peak included  
707 *FRIGIDA* (*FRI*, AT4G00650; likelihood ratio test,  $p$ -value =  $5.468 \times 10^{-35}$ ), a major flowering  
708 time determining gene. The nonsense mutation *FRI* K232X in *Cvi-0* truncates the protein and  
709 was previously shown to strongly reduce flowering time<sup>86</sup>. Adding *FRI* K232X to our model as a  
710 covariate allowed us to quantify the association with the phenotype. We found that when *FRI*  
711 K232X was added to the model, the percentage of phenotypic variance explained by all  
712 remaining markers decreased to 53.59%, with an estimated effect size for the covariate of  $-35.27$   
713  $\pm 1.50$  days. This means that this single SNP is able to reduce flowering time in this population  
714 in about 35 days and explain 46.41% of the phenotypic variance. Concordant with this estimate,  
715 in the natural population, *FRI* 232X is associated with a decrease in flowering time of 34 days  
716 (MWW test,  $W = 7$ ,  $p$ -value  $< 2.2 \times 10^{-16}$ ), and a 140-fold increase in seed number (+387 seeds;

717 MWW test,  $W = 4541$ ,  $p\text{-value} = 7.179 \times 10^{-14}$ ; Fig. 6e). In the Col-0 background, under CVI  
718 conditions, a non-functional *FRI* allele was responsible for a decrease in flowering time of 27  
719 days (MWW test,  $W = 0$ ,  $p\text{-value} = 0.00384$ ) and an increase in fitness of 669 seeds (MWW test,  
720  $W = 37.5$ ,  $p\text{-value} = 0.008856$ ; Fig. 6e).

721

722 In Fogo, we did not find any statistically significant association in GWAS for flowering time  
723 (Supplementary Fig. 11), suggesting that the genetic variant(s) underlying the uniformly reduced  
724 flowering time were fixed or at high frequency (mean=28.72 days, SD=3.76). Taking this into  
725 consideration, we scored flowering time in an inter-island F2 population in which the ancestral  
726 allele *FRI* K232 was fixed. We observed early flowering individuals segregating at  
727 approximately 1:3 ratio, indicating that a single recessive locus is causing the early flowering  
728 phenotype. After bulking and sequencing the early tail of this distribution ( $n=108$ ), we identified  
729 a single region on chromosome 5 between 2 Mbp and 3.3 Mbp where the frequency of the Fogo  
730 alleles was greater than 95% in the sequenced pool. Among the 33 variants in this region  
731 (Supplementary Data 6), 14 are at a frequency greater than 90% in the natural population and  
732 therefore they are stronger candidates to explain the uniform early flowering observed in Fogo.  
733 Of these 14, two are predicted by SnpEff<sup>28</sup> to have moderate impact, and one to have high  
734 impact.

735

736 The two moderate impact variants affect AT5G09930, an ABC transporter protein, causing a  
737 missense mutation (V193F), and AT5G07520, a glycine-rich protein expressed only in flowers  
738 during a specific developmental stage (flower stage 12), with an 11 amino acid deletion  
739 (A202\_A213del). The high impact variant is predicted as causing a premature stop codon in  
740 AT5G10140 (R3X). AT5G10140 is FLOWERING LOCUS C (*FLC*), a MADS-box protein  
741 central to the flowering time pathway. *FLC* is regulated by FRI and vernalization, contributes to  
742 temperature compensation of the circadian clock, and acts as a repressor of floral transition<sup>143,144</sup>.  
743 Due to its central function in flowering time, *FLC* is the best candidate for the early flowering  
744 observed in Fogo.

745

746 Although the flowering time gene *FLC* contains a premature truncation variant at the third  
747 amino acid fixed in Fogo, the gene could be functional, e.g., due to an alternative start codon or  
748 transcriptional read-through. To functionally characterize the nonsense mutation in *FLC* in Fogo,  
749 we quantified *FLC* mRNA levels in the natural population, and compared them to *FLC* mRNA  
750 levels in Santo Antão, Morocco, the Col-0 reference strain, and Col-0 *FRI*-Sf2 (functional *FRI* in  
751 Col-0 background) with and without a functional *FLC*<sup>111</sup> (noted as *FRI*<sup>+</sup>*FLC*<sup>+</sup> and *FRI*<sup>+</sup>*FLC*<sup>-</sup>,  
752 respectively; Supplementary Fig. 12a).

753

754 Compared to *FRI*<sup>+</sup>*FLC*<sup>+</sup>, transcript levels of *FLC* were reduced in Fogo individuals  
755 (Kruskal-Wallis,  $p$ -value  $< 1 \times 10^{-4}$ ), as expected if *FLC* R3X results in non-functional *FLC*.

756 Similarly, *FLC* transcription was reduced in *FRI*<sup>+</sup>*FLC*<sup>-</sup> and Col-0 wild-type (non-functional FRI  
757 and functional FLC) compared to *FRI*<sup>+</sup>*FLC*<sup>+</sup> (Kruskal-Wallis, *p*-value < 1x10<sup>-4</sup>), which was  
758 consistent with previous findings<sup>109</sup>. In contrast, all accessions from Santo Antão showed high  
759 levels of *FLC* expression (comparable to *FRI*<sup>+</sup>*FLC*<sup>+</sup>; Kruskal-Wallis, *p*-value > 0.6783). This  
760 result is in agreement with previous work showing a higher baseline expression of *FLC* in Cvi-  
761 0<sup>86,109</sup>. Within Santo Antão, the single sample tested with a functional FRI (S5-10) had higher  
762 *FLC* expression compared to the other samples from Santo Antão (Kruskal-Wallis, *p*-values:  
763 Cvi-0=0.0006; S1-1=0.0039; S15-3=0.0008), consistent with an effect of *FRI* on *FLC* expression  
764 even in the CVI genetic background<sup>86,109</sup>. In Moroccan accessions, we observed high levels of  
765 *FLC* expression across populations, with much larger variation.

766

767 The two loci, *FRI* and *FLC*, explain the differences in bolting time in the tested accessions  
768 (Supplementary Figure 12b). In the Col-0 background, when both loci have functional alleles  
769 (*FRI*<sup>+</sup>*FLC*<sup>+</sup>), the plants bolted later than when either of the loci had one non-functional allele  
770 (non-functional FRI in Col-0 and non-functional FLC in *FRI*<sup>+</sup>*FLC*<sup>-</sup>; Kruskal-Wallis, *p*-value =  
771 0.0047 and *p*-value = 0.0002, respectively). In Santo Antão, all individuals bolted early,  
772 comparable to Col-0 (Kruskal-Wallis, for S1-1, S15-3, Cvi-0: *p*-value = 1) and *FRI*<sup>+</sup>*FLC*<sup>-</sup>  
773 (Kruskal-Wallis, for S15-3, Cvi-0: *p*-value = 1, for S1-1: *p*-value = 0.2376), as all accessions  
774 carry a non-functional FRI. The exception was S5-10, which bolted later (Kruskal-Wallis, *p*-  
775 values: Cvi-0=0.0005; S1-1=0.5811; S15-3=0.0026) due to a functional *FRI* allele. This  
776 accession also showed higher levels of *FLC* expression, consistent with a role of regulation of

777 *FLC* mRNA levels by *FRI*<sup>86,109</sup>. In Fogo, the non-functional *FLC* present in all accessions is  
778 consistent with the early bolting and the low levels of *FLC* mRNA, both comparable to the non-  
779 functional *FLC* mutant in the Col-0 background (Kruskal-Wallis, for F10-1-3, F13-8, F9-2: *p*-  
780 value = 1, for F3-2: *p*-value = 0.2014). In Morocco, the levels of *FLC* mRNA did not completely  
781 explain the bolting time, suggesting that other loci may influence this trait in this population.

782

783 To further test whether *FLC* is responsible for the early flowering phenotype in Fogo, we  
784 conducted a genetic complementation test, by crossing 4 individuals from Fogo (all with a  
785 potential non-functional *FLC* allele) to Col-0 *FRI*-Sf2 with and without a functional *FLC* (noted  
786 as *FRI*<sup>+</sup>*FLC*<sup>+</sup> and *FRI*<sup>+</sup>*FLC*<sup>-</sup> (111), respectively; Supplementary Fig. 12).

787

788 If the allele in Fogo was non-functional, when crossed to *FRI*<sup>+</sup>*FLC*<sup>-</sup>, all F1 individuals would  
789 flower as early as *FRI*<sup>+</sup>*FLC*<sup>-</sup>, as they would carry non-functional *FLC* alleles from both parents.  
790 In this case, F1 individuals homozygous for the null-allele at *FLC* would also flower earlier than  
791 heterozygous individuals (F1 from the cross between *FRI*<sup>+</sup>*FLC*<sup>+</sup> and *FRI*<sup>+</sup>*FLC*<sup>-</sup>), given that the  
792 functional *FLC* allele should be dominant<sup>109,111</sup>. On the other hand, if the *FLC* allele in Fogo was  
793 functional, the F1 individuals from this cross would have one functional allele and flower later  
794 than *FRI*<sup>+</sup>*FLC*<sup>-</sup>, and similar to the heterozygous individuals (F1 from the cross between  
795 *FRI*<sup>+</sup>*FLC*<sup>+</sup> and *FRI*<sup>+</sup>*FLC*<sup>-</sup>). In the inverse cross – between Fogo and *FRI*<sup>+</sup>*FLC*<sup>+</sup> – if the Fogo



796 allele is non-functional, we expect the F1 to be heterozygous and flower as late as  $FRI^+FLC^+$  and  
797 similarly to the F1 resultant from the cross between  $FRI^+FLC^+$  and  $FRI^+FLC^-$ .

798

799 For the crosses between Fogo individuals and  $FRI^+FLC^-$ , we found that all F1 individuals  
800 flowered as early as the parental line  $FRI^+FLC^-$  (MWW test,  $W = 42$ ,  $p$ -value = 0.3611), much  
801 earlier than the  $FRI^+FLC^+$  (MWW test,  $W = 0$ ,  $p$ -value = 0.00248) and the F1 heterozygous  
802 between  $FRI^+FLC^+$  and  $FRI^+FLC^-$  (MWW test,  $W = 4$ ,  $p$ -value = 0.0002342). On the other hand,  
803 all the F1 individuals from the cross between Fogo and  $FRI^+FLC^+$  flowered as late as the FLC  
804 functional parental line  $FRI^+FLC^+$  (MWW test,  $W = 34$ ,  $p$ -value = 0.8814), much later than the  
805 Fogo parents (MWW test,  $W = 256$ ,  $p$ -value =  $1.301 \times 10^{-6}$ ) and also later than the F1 between  
806 Fogo and  $FRI^+FLC^-$  (MWW test,  $W = 116.5$ ,  $p$ -value = 0.001227). These results together suggest  
807 that the *FLC* 3X allele found in the natural population in Fogo is indeed non-functional.

808

809 Next, we inferred the coalescent genealogies of FRI 232X and FLC 3X using RELATE<sup>113</sup>.  
810 The coalescent tree for FRI 232X is bifurcated rather than hierarchical at the time when the  
811 variant is estimated to have arisen, indicating that some branches were likely lost (extinct) or  
812 unsampled in the modern populations. The time of the bifurcation is estimated at approximately  
813 2.9 kya, with 95% CI estimated from 200 samples from the MCMC approximately 2.14 kya –  
814 3.74 kya. The tMRCA, which represents the lower bound on the age, is 2.14 kya (95% CI: 1.62-  
815 2.72 kya). Based on the coalescent reconstruction for FLC 3X and 200 sampled trees, the allele

816 arose between the tMRCA at 3.3 kya (95% CI: 2.82-3.96 kya) and the split from the outgroup at  
817 4.72 kya (95% CI: 3.56-6.66 kya).

818

819 We inferred the frequency trajectories for FRI 232X and FLC 3X using CLUES<sup>119</sup>, which  
820 uses importance sampling over trees generated in RELATE to infer the frequency trajectories  
821 and selection coefficients for the functional variants. For each variant, we defined time bins  
822 (epochs) between the present and the emergence of the allele (based on the inferred age of the  
823 allele in RELATE when approximately 97.5% of the coalescent trees for the region support the  
824 existence of the allele). For FRI 232X, these epochs were 0-2 kya and 2-4 kya. For this variant,  
825 we found that  $s$  was maximized in the epoch 2-4 kya years ago, with a selection coefficient of  
826 4.56% (Supplementary Table 6). For FLC 3X, these epochs were 0-2 kya, 2-4 kya, and 4-6 kya,  
827 with the inferred selection coefficient maximized 4-6 kya with  $s = 9.27%$  (Supplementary Table  
828 7).

829

## 830 **Supplementary Note 6. Assessing the fit of adaptation in CVI to models of** 831 **selection**

832 Theory predicts that when mutational input is low and selection is strong (SSWM regime),  
833 the first steps of adaptation are likely to occur through large effect mutations, whereas when  
834 mutational input is high and selection is weak (WSSM regime), adaptation is likely to occur

835 through more, smaller effect variants<sup>120–122,145–148</sup>. We examine the CVI case in the context of  
836 SSWM versus WSSM regimes. First, we approximate the genome-wide mutation rate for the  
837 adaptive phenotype (very early flowering through loss of vernalization) and then we apply the  
838 inferences we made about population history and selection coefficients to examine the fit of  
839 adaptation in each of the two Cape Verde islands to these two models.

840

841 The SSWM model is expected to hold when the total number of new mutations that enter a  
842 diploid population each generation is small such that  $4NU_b \ll 1$  (where  $N$  is population size and  
843  $U_b$  is the genome-wide beneficial mutation rate for the focal trait) and when selection is strong  
844  $4Ns \gg 1$ . In this scenario, single new beneficial mutations arise and overcome genetic drift ( $s \gg$   
845  $1/4N$ ) and subsequently rise in frequency without interference (by linkage or epistasis) from  
846 beneficial alleles at other loci<sup>120–122</sup>. Note that small population size (as in a founder population)  
847 plays a double role. On one hand, it enables SSWM type adaptation by restricting the mutation  
848 input; on the other hand, it can inhibit adaptation altogether unless selection is strong. The  
849 combination of small population size and strong selection is expected to result in a “selective-  
850 sweep type” architecture of adaptation<sup>149</sup> where one or few variants with large effects underlie  
851 the adaptive phenotype. Alternatively, adaptation in the WSSM regime occurs through small  
852 frequency shifts at a large number of alleles with small individual effect. Theory shows that  
853  $4NU_b = 1$  is indeed the threshold that separates the sweep-like from highly polygenic  
854 architectures<sup>149,150</sup>.

855

856 Time to flowering has been studied extensively in *A. thaliana* and much is known about its  
857 molecular basis. We used available molecular and functional analyses of major flowering time  
858 loci to produce rough approximations of  $U_b$ . First, we reviewed the literature to identify the loci  
859 and mutational effects that lead to effects on flowering time. Many genes can contribute to  
860 variation in flowering time (at least 174 genes are thought to be involved in the flowering time  
861 pathway ([https://www.mpipz.mpg.de/14637/Arabidopsis\\_flowering\\_genes](https://www.mpipz.mpg.de/14637/Arabidopsis_flowering_genes)<sup>151-154</sup>). However,  
862 very few of these cause large or even moderate changes in flowering time. A more relevant  
863 (specific) phenotype in this case is the loss of the vernalization requirement (i.e., cold period  
864 needed to induce flowering), which results in a large reduction in flowering time. The loci most  
865 often implicated in this trait are *FRI* and *FLC*, both of which are essential for vernalization  
866 response. Loss of function of either of these genes results in loss of the vernalization requirement  
867 for flowering. When diverse rapid flowering accessions were examined, 85% turned out to have  
868 clear evidence of functional mutations in *FRI*, *FLC* or both<sup>109,152</sup>. In the absence of a  
869 vernalization treatment, complete loss of function of these genes results in a reduction of  
870 flowering time of approximately 35 days relative to wild type (Fig. 7e). In nature, variation in  
871 *FRI* occurs primarily by loss of function mutations in coding regions<sup>109,123</sup>, while most putative  
872 functional variation in *FLC* is found in the first intron<sup>124,125</sup>, which contains a well-characterized  
873 regulatory element<sup>126</sup>.

874

875       Based on this information about the genetic basis of large effect changes in flowering time  
876 (vernalization), we can roughly estimate  $U_b$ , the genome-wide per individual mutation rate of  
877 beneficial mutations that act through the focal phenotype (the number of nucleotides whose  
878 changes would cause a large shift in phenotype).

879

880       First, we focus on loss of function mutations due to SNPs in coding regions of the genes  
881 involved in complete loss of vernalization (*FRI* and *FLC*). For these, the total length of the two  
882 genes is 805 amino acids. We estimate that on average three out of 64 mutations could lead to a  
883 premature stop codon. This results in a mutational target size for loss of function through SNPs  
884 in coding regions of  $805 \times 3/64$ . We assume a mutation rate by SNP changes of  $7.1 \times 10^{-9}$  <sup>(115)</sup>. The  
885 rate of introduction of loss of function mutations by premature stop codons per individual and  
886 per generation is therefore:

887       
$$U_{b(\text{coding\_SNPs})} = 805 \times 3/64 \times 7.1 \times 10^{-9} = 2.68 \times 10^{-7}$$

888       We can additionally account for mutation by indels, using the mutation rate estimated from  
889 mutation accumulation lines. We used the per base mutation rate estimated for 1-3 bp long  
890 deletions,  $4.0 \times 10^{-10}$  <sup>(115)</sup>. The mutational target size is then 805 amino acids \* 3  
891 nucleotides/amino acid. The rate of introduction of indel mutations in the coding region is  
892 therefore:

893       
$$U_{b(\text{coding\_indels})} = 805 \times 3 \times 4 \times 10^{-10} = 9.66 \times 10^{-7}$$

894 Combining the probability of mutation by SNPs or indels in coding regions gives:

895 
$$U_{b(\text{coding})} = 2.68 \times 10^{-7} + 9.66 \times 10^{-7} = 1.23 \times 10^{-6}$$

896 Regulatory mutations in *FLC* and *FRI* also have the potential to impact flowering time. To  
897 include the possibility of regulatory mutations in our estimate of  $U_b$ , we estimated the probability  
898 that a mutation has a major regulatory effect based on the literature. Regulatory elements can  
899 include promoter regions as well as conserved non-coding elements upstream, downstream or  
900 within introns. For *FRI* and *FLC* these are well-studied. Core promoters are on average  
901 approximately 75 bp in *A. thaliana* and are tightly packed with regulatory elements<sup>124</sup>. Given a  
902 moderate level of nucleotide-level functional redundancy, we assumed that one in 10 possible  
903 changes in the core promoter could have major functional effects. In addition, we assumed that  
904 larger 5' regions with interspersed transcription factor binding sites would add 300 bp to the  
905 core<sup>155</sup>. In these regions regulatory motifs are generally more dispersed and redundancy is likely  
906 to be rather high at the nucleotide level. We assumed that on average the probability of a  
907 mutation resulting in a strong functional effect in these regions would be one in 50. In *FLC* there  
908 is evidence that motifs exist within a 'vernalization response element' in the first intron (289 bp)  
909 that are crucial to function<sup>126</sup>. Here, we assumed that one in 20 mutations may result in large  
910 changes in flowering time.

911

912 While we attempted to come to a meaningful approximation of the number of variants  
913 (mutational target size) that might have *major* effects on regulatory function of *FLC* or *FRI*,

914 assumptions about this mutational target size are necessarily less certain. However, the final  
915 estimate would not change much if other biologically informed estimates were used.

$$916 \quad U_{b(\text{regulatory FRI/FLC\_SNPs})} = (150 \times 0.1 + 600 \times 0.02 + 289 \times 0.05) \times 7.1 \times 10^{-9} = 2.94 \times 10^{-7}$$

917 And including indels in regulatory regions gives us:

$$918 \quad U_{b(\text{regulatory FRI/FLC\_indels})} = (41.45) \times 4 \times 10^{-10} = 1.66 \times 10^{-8}$$

919 So that the combined probability of a major effect mutation in regulatory regions by SNPs or  
920 indels is:

$$921 \quad U_{b(\text{regulatory})} = 2.94 \times 10^{-7} + 1.66 \times 10^{-8} = 3.11 \times 10^{-7}$$

922 And the combined probability of any mutation with a major effect on the vernalization  
923 requirement is:

$$924 \quad U_b = 1.23 \times 10^{-6} + 3.11 \times 10^{-7} = 1.54 \times 10^{-6}$$

925 Using the estimate for  $U_b$  and an assumption about past population size, we can infer the  
926 waiting time for a mutation in the natural population. Then, using our inference about selection  
927 coefficients from the allele frequency trajectory in each island, we can assess how each estimate  
928 fits with SSWM and WSSM models. We initially focus on Fogo because the population history  
929 there is simpler and resolved with higher certainty. Then we turn to Santo Antão, and make some  
930 approximations and an estimate for that population.

931 For  $N$ , we used the estimate of  $N_e$  from RELATE/COLATE in the Fogo population ( $N_e=48$   
932 individuals at colonization). With that, the per generation population mutation rate for a strong  
933 effect functional variant in *FRI* or *FLC* would be

$$934 \quad \Theta_{(FRI/FLC)} = 4N_eU_b = 4 \times 48 \times 1.54 \times 10^{-6} = 2.95 \times 10^{-4} \ll 1.0$$

935 There is of course uncertainty in this result from our rough estimate of both  $U_b$  and  $N_e$ .  
936 However, as our derivation leaves considerable room for error of almost four orders of  
937 magnitude, the conclusion that adaptation of our focal trait (loss of vernalization requirement) is  
938 mutation limited ( $\Theta_{(FRI/FLC)} \ll 1$ ) appears to be highly plausible. Our estimate corresponds to an  
939 expected waiting time for the occurrence of any mutation that abolishes function of the genes of  
940  $1/\Theta = 3775$  generations. If we break this down into coding and non-coding we find that the  
941 estimated waiting time for a coding change specifically is  $(1/4N_eU_{b(\text{coding\_FLC/FRI})}) = 4727$   
942 generations and the waiting time for loss or major reduction of function through a regulatory  
943 change specifically is estimated at  $(1/4N_eU_{b(\text{regulatory\_FLC/FRI})}) = 18,694$  generations. Based on this,  
944 if such a variant was required to escape eventual extinction, extinction risk would be very high.  
945 Further, given the much lower non-coding adaptive mutation rate, an adaptive mutation from  
946 variation in the coding region would be much more likely in this case.

947

948 Under the SSWM model, strong selection is required in order to escape drift. Here, we apply  
949 a selection coefficient based on the reconstructed frequency trajectory of FLC 3X in the time just  
950 after it is estimated to have arisen ( $s = 0.0927$ ). If FLC 3X resulted in a population size increase,



951 this estimate would be highly conservative because the population size change is used as the null  
952 model here. Recall that SSWM is expected to hold when  $4N_u s \ll 1$  and  $s \gg 1/4N_e$ . Even with  
953 the conservative estimate of  $s$ , we find that this is well above  $1/4N_e$ :  $s = 0.0927$  and  $1/4N_e =$   
954  $5.21 \times 10^{-3}$ . This implies that a new mutation that obliterates the vernalization requirement in a  
955 Fogo-like environment would tend to escape drift. We conclude that the scenario is consistent  
956 with the SSWM regime, where adaptation relies on sweeps of large-effect alleles<sup>120,147,149,150</sup>.

957

958 Of course, variance on the estimates of the time for a variant to arise and fix in the  
959 population would be high due to the stochastic nature of mutation and the uncertainty of  
960 establishment. We conducted simulations under a model designed to fit the Fogo population to  
961 quantify the probability of fixation under a constant-size Wright-Fisher model with three  
962 plausible estimates of the selfing coefficient (90%, 95% and 99%). The model ignores the  
963 possibility of extinction, a risk that may be high under individual and/or temporal (e.g., due to  
964 climate) variance in reproductive success. After 6000 generations, 13.5 - 24% % runs resulted in  
965 fixation of the adaptive variant (a variant that eradicates the vernalization requirement)  
966 (Supplementary Table 8). The time of the simulated trajectories was inverted to a backwards in  
967 time model to follow the same structure as the inferred trajectory from CLUES. Supplementary  
968 Figure 14 shows the trajectories of functional variants that arise under the three different selfing  
969 coefficients along with the inferred trajectory.

970

971 Santo Antão fits somewhat less well with the idealized model due to its more complex  
972 history. The colonization event in Santo Antão is confounded with the much earlier split from the  
973 ‘ghost’ population. Further, population structure appears to have developed in Santo Antão well  
974 before FRI 232X appeared, consistent with a more permissive landscape where late-flowering  
975 plants could survive to reproduce potentially with moderate to high success in some years. We  
976 consider a range of possible  $N_e$  from 500 to 1000 based on the estimated  $N_e$  in Santo Antão at the  
977 time when FRI 232X arose. We examine the scenario with  $s$  set to 0.046 based on the selection  
978 coefficient inferred from the frequency trajectory of FRI 232X in Santo Antão during the peak of  
979 selection.  $U_b$  is the same as in the Fogo case.

980

981 With these assumptions  $4N_eU_b$  would range from  $3.08 \times 10^{-3}$  to  $6.16 \times 10^{-3}$ , which is again  
982 much less than 1.0, indicating limited mutational input for adaptation. And  $s$  of 0.046 is much  
983 greater than  $1/4N_e$ , which ranges from  $5 \times 10^{-4}$  to  $2.5 \times 10^{-4}$ , consistent with expectations for a  
984 SSWM model, albeit less extreme than the Fogo case.

985

986 Given that most observed large changes in flowering time in nature can be attributed to  
987 changes in *FRI* and *FLC* (85%)<sup>109,152,156–159</sup>, it seems reasonable to focus on these genes in our  
988 analysis of mutational target size. But there are many genes across the genome that act in the  
989 flowering time pathway and through which variation could affect flowering time. If we  
990 broadened the phenotypic definition to include variants with less extreme effects on flowering

991 time, the architecture of the trait would be more polygenic and  $U_b$  would be larger. A few other  
992 genes are known to have fairly large effects on flowering time (ranging from 6 to 10 days) and  
993 act through vernalization (e.g., *FLM*, genes in the *MAF2-5* gene cluster, and *SVP*). We could  
994 attempt to calculate expected waiting times for any change in flowering time under progressively  
995 more polygenic architectures. While we have no estimate of  $s$  to which we could compare in  
996 these cases, we can assume that it would be smaller, and that drift would then play a much more  
997 important role in the probability that mutations in these genes would be established in the  
998 population. In a larger population, where new variants were less susceptible to loss by drift, the  
999 first steps of adaptation may be more likely to include variants in genes with weaker effects.

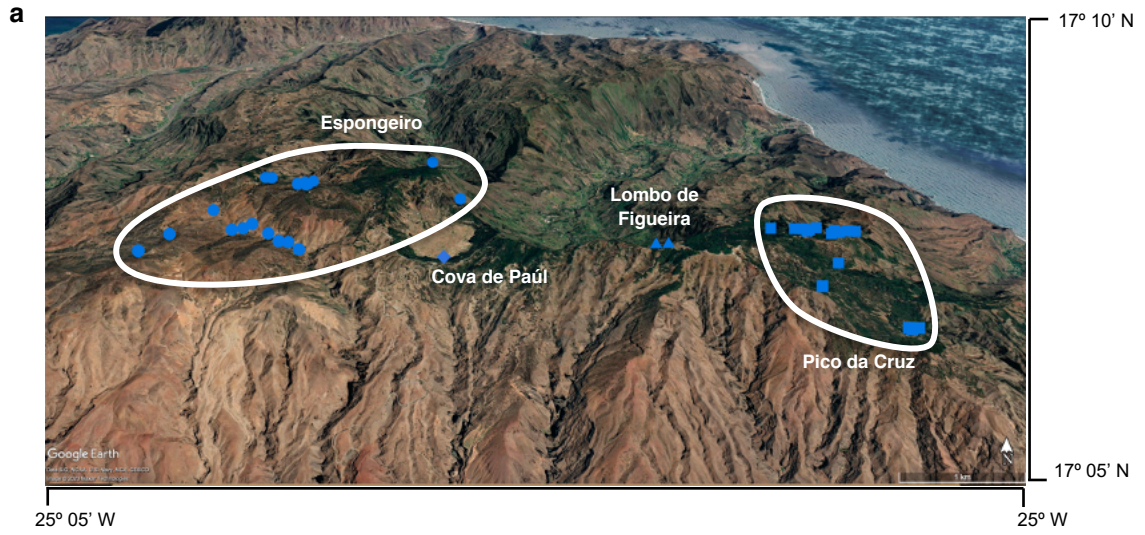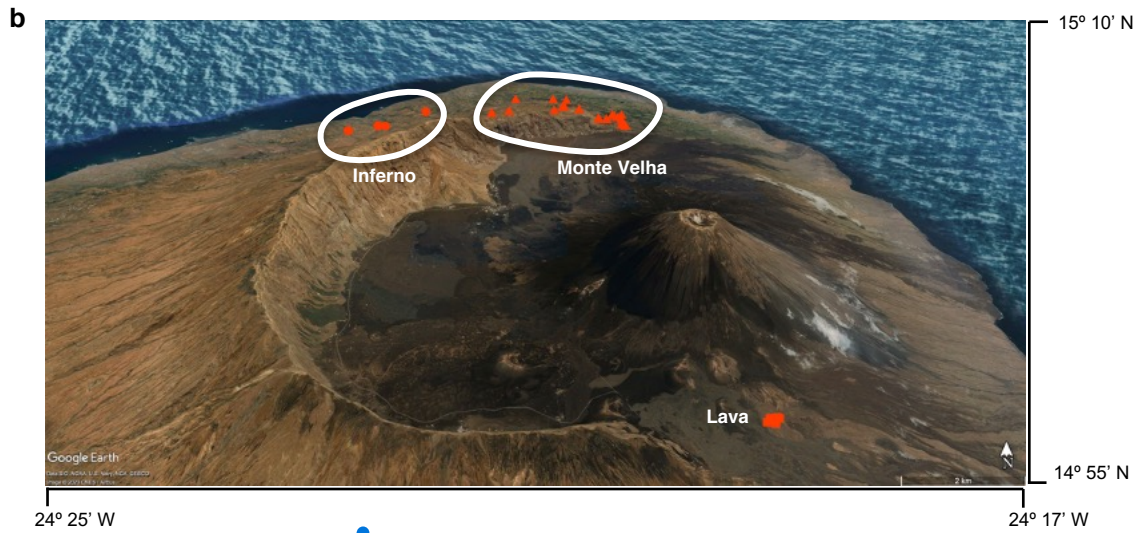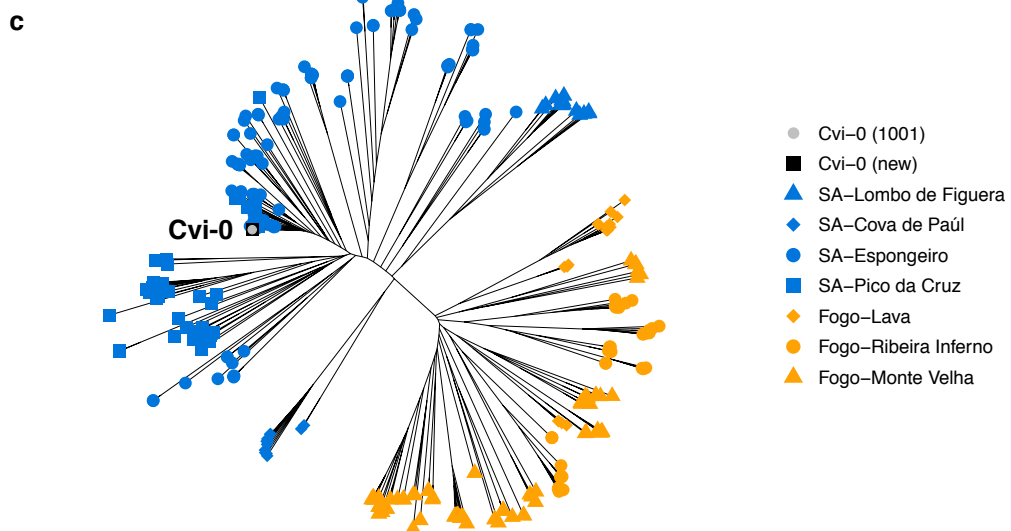

1001 **Supplementary Figure 1. Geographic locations and genetic clustering of CVI samples.**  
1002 Maps of sub-populations in **a**, Santo Antão and **b**, Fogo. Maps were created using Google Earth  
1003 basemaps <sup>160,161</sup>. **c**, Neighbour-joining tree showing deep separation between islands and  
1004 clustering of island sub-populations. Cvi-0 clusters with the Santo Antão population. Samples  
1005 from Santo Antão are shown in blue, with sub-populations denoted as follows: Lombo de  
1006 Figueira (triangles), Cova de Paúl (diamonds), Espongeiro (circles), and Pico da Cruz (squares).  
1007 Samples from Fogo are shown in orange, with sub-populations denoted as Lava (diamonds),  
1008 Ribeira Inferno (circles), and Monte Velha (triangles). Cvi-0 (1001) represents the Cvi-0  
1009 sequenced in the 1001 Genomes Project for *Arabidopsis thaliana*, while Cvi-0 (new) represents  
1010 the Cvi-0 re-sequenced in this study. Source data are provided as a Source Data file.

1011

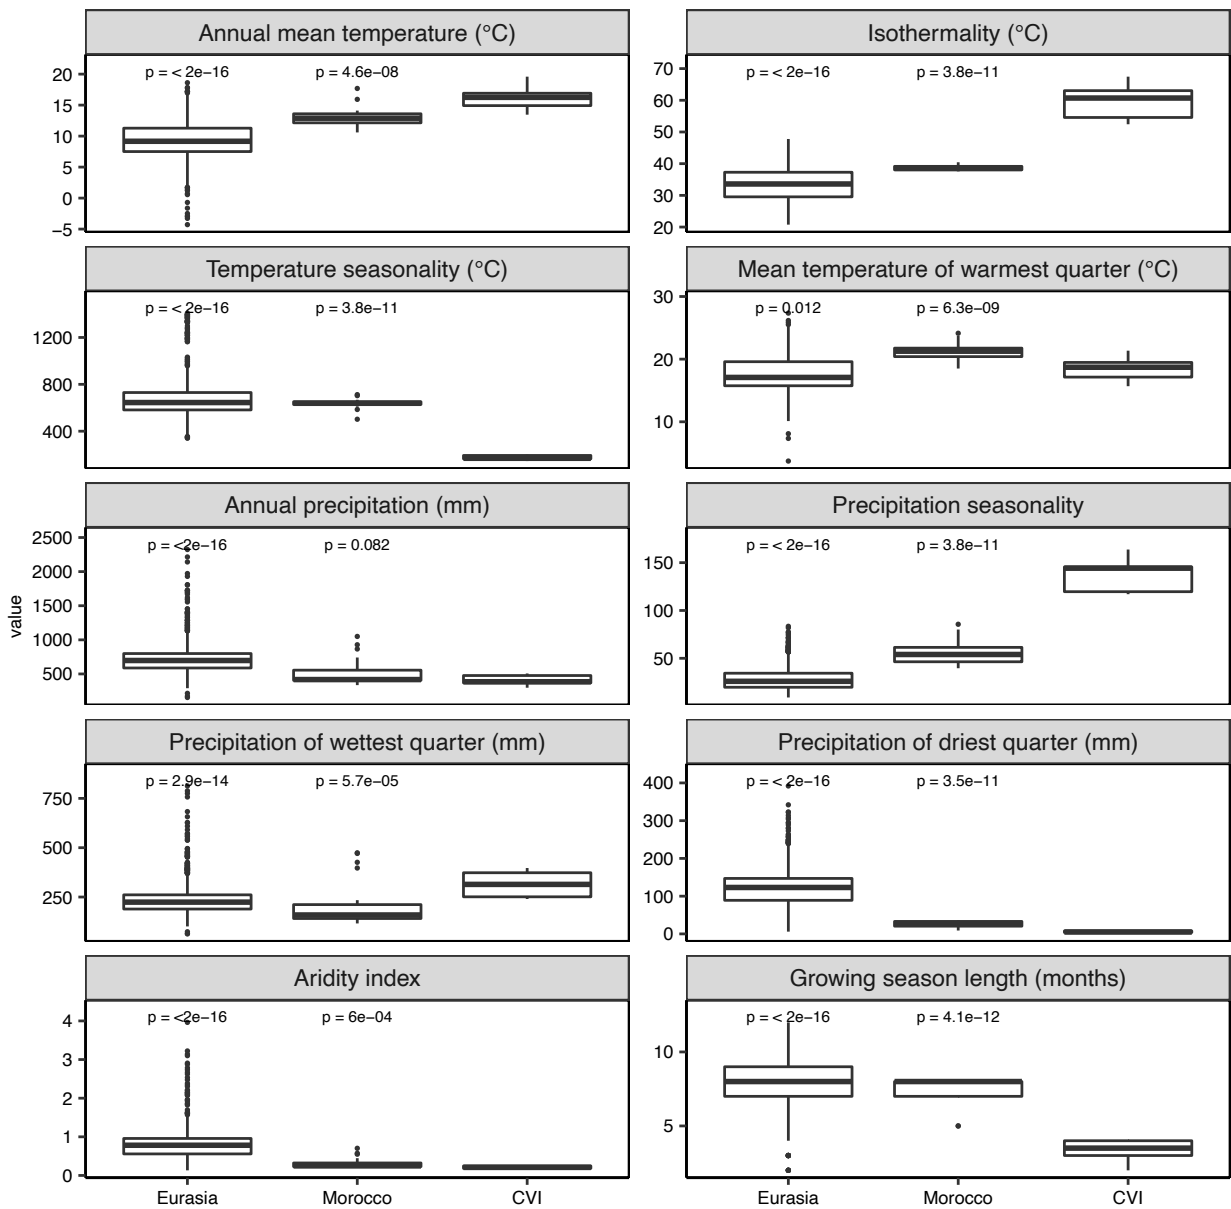

1012

1013 **Supplementary Figure 2. Climate at collection sites in CVI relative to Moroccan and**  
 1014 **Eurasian sites.** The three populations are shown on the x-axis, while the values for each climatic  
 1015 variable are shown on the y-axis. Each variable is presented with the respective unit. Boxplots

1016 show median, 1<sup>st</sup> and 3<sup>rd</sup> quartiles, and whiskers represent 95% CI. *P*-values for two-sided  
1017 Wilcoxon tests are shown for Morocco (n=20) and Eurasia (n=1060) relative to CVI (n=56).  
1018 Annual mean temperature: Eurasia: *p*-value < 2x10<sup>-16</sup>, Morocco: *p*-value = 4.6x10<sup>-8</sup>;  
1019 Isothermality: Eurasia: *p*-value < 2x10<sup>-16</sup>, Morocco: *p*-value = 3.6x10<sup>-11</sup>; Temperature  
1020 seasonality: Eurasia: *p*-value < 2x10<sup>-16</sup>, Morocco: *p*-value = 3.8x10<sup>-11</sup>; Mean temperature of the  
1021 warmest quarter: Eurasia: *p*-value = 0.012, Morocco: *p*-value = 6.3x10<sup>-9</sup>; Annual precipitation:  
1022 Eurasia: *p*-value < 2x10<sup>-16</sup>, Morocco: *p*-value = 0.082; Precipitation seasonality: Eurasia: *p*-value  
1023 < 2x10<sup>-16</sup>, Morocco: *p*-value = 3.8x10<sup>-11</sup>; Precipitation of the wettest quarter: Eurasia: *p*-value =  
1024 2.9x10<sup>-14</sup>, Morocco: *p*-value = 5.7x10<sup>-5</sup>; Precipitation of driest quarter: Eurasia: *p*-value < 2x10<sup>-</sup>  
1025 <sup>16</sup>, Morocco: *p*-value = 3.5x10<sup>-11</sup>; Aridity index: Eurasia: *p*-value < 2x10<sup>-16</sup>, Morocco: *p*-value =  
1026 6x10<sup>-4</sup>; Growing season length: Eurasia: *p*-value < 2x10<sup>-16</sup>, Morocco: *p*-value = 4.1x10<sup>-12</sup>. Source  
1027 data are provided as a Source Data file.

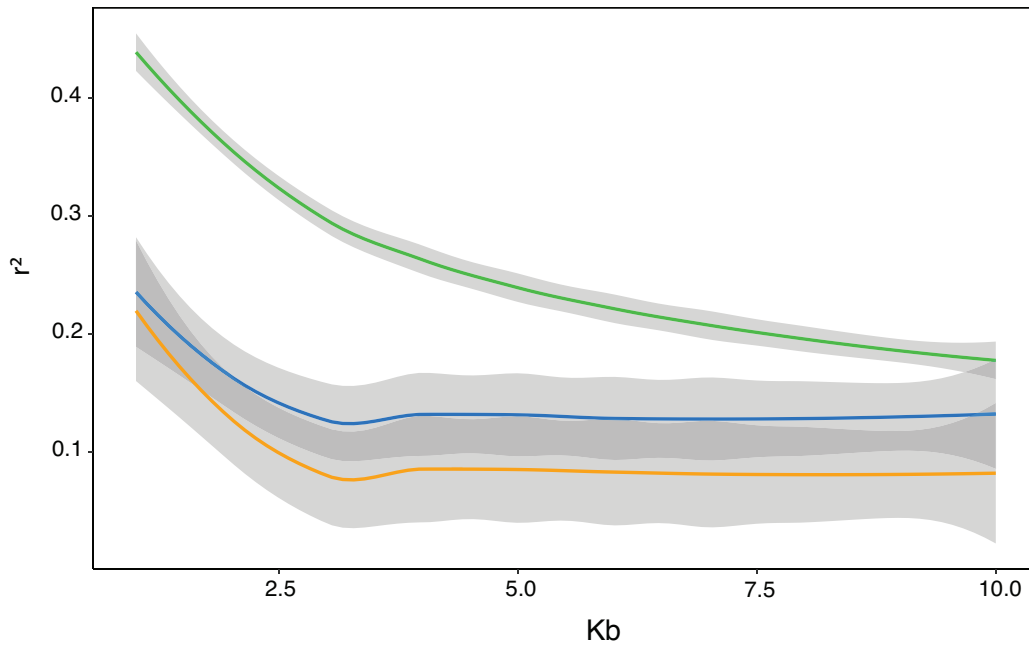

1028

1029 **Supplementary Figure 3. Linkage disequilibrium (LD) decay in all three populations.** X-  
1030 axis shows distance between SNPs in kbp, and the y-axis the corresponding  $r^2$  value. Decay of  
1031 LD is shown for Santo Antao (blue), Fogo (orange) and Morocco (green). Lines were smoothed  
1032 with locally weighted scatterplot smoothing (LOESS) and the shaded grey area represents the  
1033 95% confidence interval.

1034



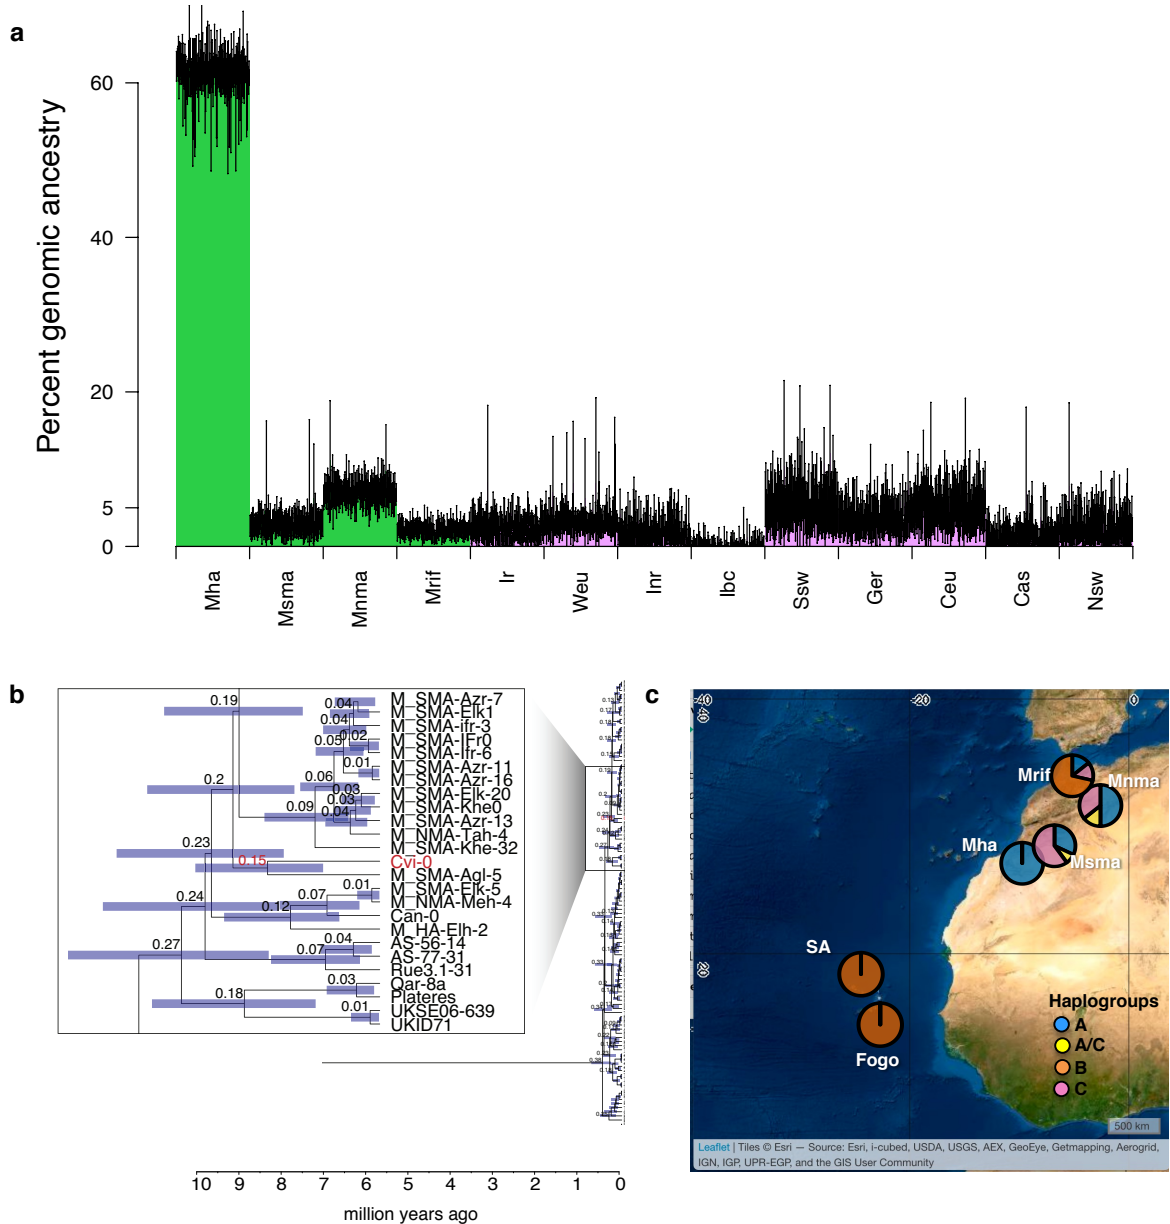

1035

1036 **Supplementary Figure 4. Local ancestry of CVI genomes.** **a**, The percentage of CVI genomes  
 1037 for which the closest relative is found in each continental population, inferred with  
 1038 Chromopainter. Averages across runs are shown as coloured bars, 95% confidence interval (CI)  
 1039 as vertical black lines, one for each of 148 CVI genomes. Genome-wide, the Moroccan

1040 population in the High Atlas Mountain is the closest relative for 61% of CVI genomes. **b**, Region  
1041 of the chloroplast phylogeny with Cvi-0 and worldwide accessions (Full phylogeny in  
1042 Supplementary Fig. 5). Cvi-0 clusters with the Moroccan population from South Middle Atlas  
1043 with an estimate of 150 ky divergence time from the closest Moroccan individual. Numbers at  
1044 the nodes are divergence time in million years. Purple shades represent the 95% CI. **c**,  
1045 Geographic distribution of S-locus haplogroups in Morocco and CVI. All individuals from the  
1046 islands carry haplogroup B, which is only found in the Rif population in Morocco. Different  
1047 colours in the pie charts represent different haplogroups: A in blue, A/C in yellow, B in orange,  
1048 and C in pink. Abbreviations: Mha, Moroccan High Atlas; Msma, Moroccan South Middle  
1049 Atlas; Mnma, Moroccan North Middle Atlas; Mrif, Moroccan Rif; Ir, Iberian relicts; Weu,  
1050 Western Europe; Inr, Iberian non-relicts; Ibc, Italy, Balkans and Caucasus; Ssw, South Sweden;  
1051 Ger, Germany; Ceu, Central Europe; Cas, Central Asia; Nsw, North Sweden; SA, Santo Antão.  
1052 Basemap was retrieved from the World Imagery map<sup>162</sup> using leaflet<sup>163</sup>. Source data are provided  
1053 as a Source Data file.

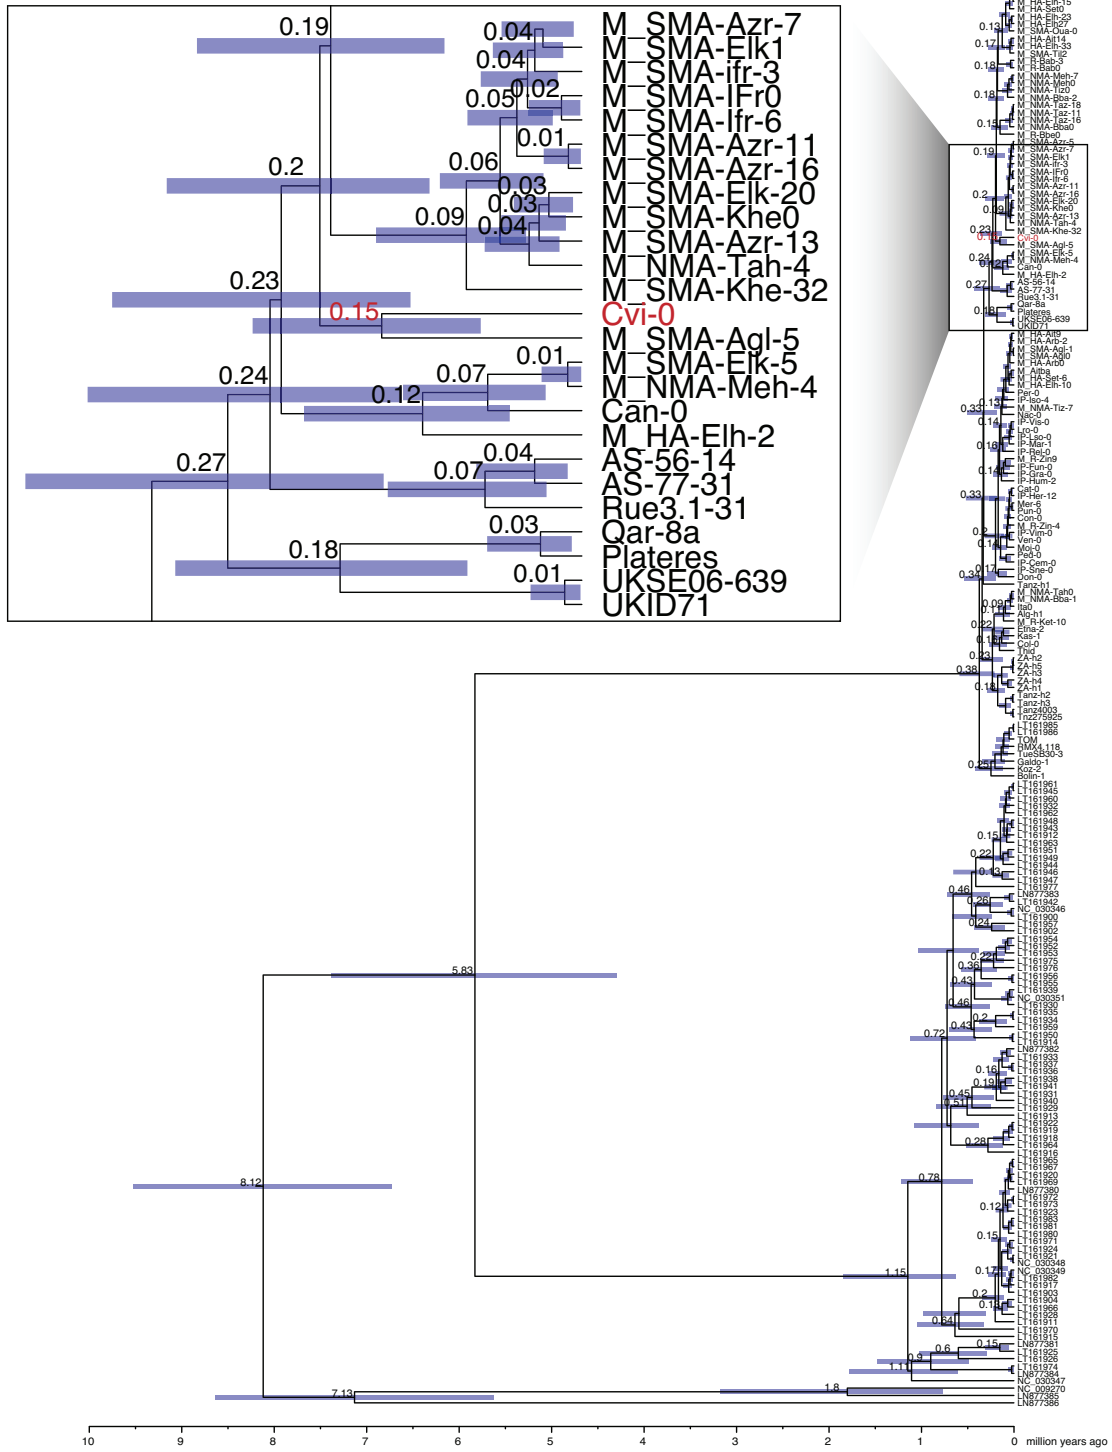

1055 **Supplementary Figure 5. Time-calibrated chloroplast phylogeny showing the location of**  
1056 **Cvi-0 relative to representatives of *A. thaliana*, and other *Arabidopsis* species, *Capsella***  
1057 ***grandiflora*, *Capsella bursa-pastoris* as well as *Camelina sativa* for calibration. Inset shows**  
1058 **the location of Cvi-0.**

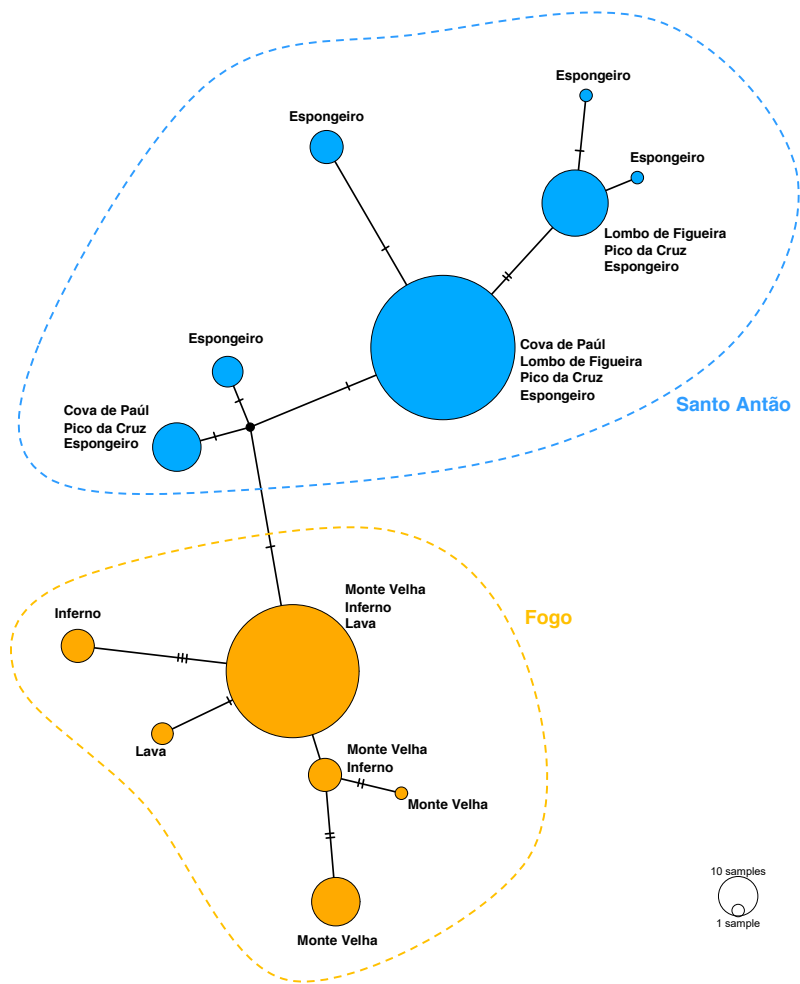

1059

1060 **Supplementary Figure 6. Chloroplast network for all CVI accessions.** The size of the nodes

1061 is proportional to the number of samples, with the corresponding cluster name. Blue represents

1062 haplotypes in Santo Antão, orange in Fogo.

1063

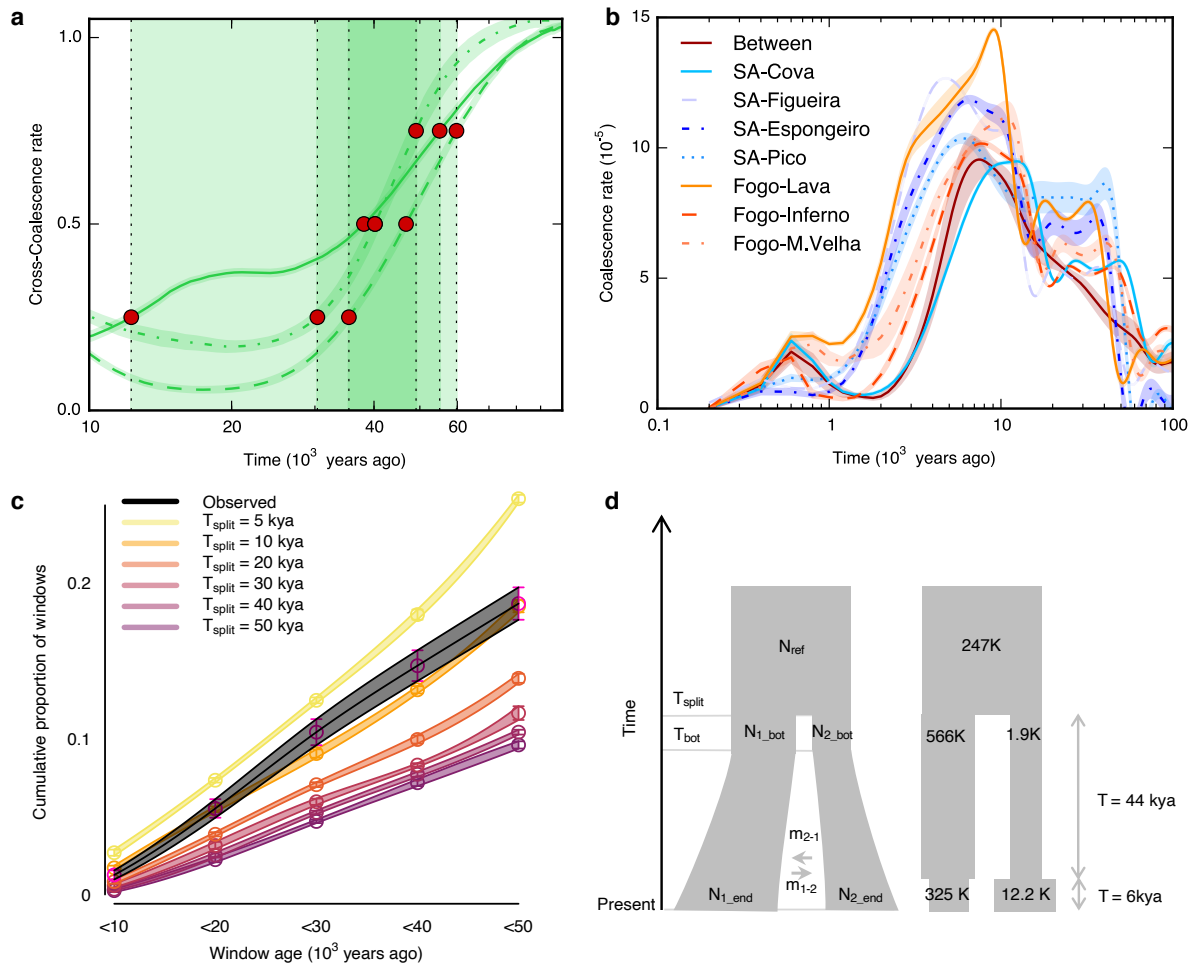

1064

1065 **Supplementary Figure 7. Modelling of Morocco-CVI split.** **a**, Split time estimated with  
 1066 MSMC-CCR for the Moroccan populations and CVI. Solid line represents the High Atlas  
 1067 population, dashed line the North Middle Atlas and dash-dotted line the South Middle Atlas  
 1068 populations. 0.25 – 0.75 cross coalescence rate quantiles are shown as shaded areas, with point  
 1069 estimates at 0.25, 0.5 and 0.75 highlighted by red dots. **b**, Coalescence rate as a function of time  
 1070 within Santo Antão and Fogo clusters, and between islands (‘Between’), estimated with MSMC2  
 1071 in 8-haplotypes mode. Lines represent means across octets, shaded areas the 95% CI. **c**,

1072 Cumulative proportion of genomic windows with different inferred ages based on the density of  
1073 mutations. Simulations were run with a split at different times (5-50 kya) between a Morocco-  
1074 like and CVI-like population. Points represent observed data and averages across simulations.  
1075 Whiskers represent 95% CI based on the SE estimated with ordinary non-parametric bootstrap  
1076 for observed data and on the SE across simulations. Points were interpolated with cubic splines.  
1077 Simulations with a split at 10 kya most closely match the observed data, supporting a  
1078 colonization of CVI from a ‘ghost’ population more recent than 10 kya. **d**, Overview of models  
1079 run in dadi (left) and best model (right).  $N_{ref}$ , size of the ancestral population;  $N_{1\_bot}$ ,  $N_{2\_bot}$ , size  
1080 of population one and two at the split, respectively; only in the bottleneck models,  $N_{1\_bot}$  and  
1081  $N_{2\_bot}$  remain constant for the duration of the bottleneck,  $T_{bot}$ ;  $N_{1\_end}$ ,  $N_{2\_end}$ , population sizes at  
1082 present;  $T_{split}$ , split time;  $m_{12}$ ,  $m_{21}$ , migration rates. Estimates of the split time with MSMC-CCR  
1083 reveal a complex scenario, likely due to the absence of a direct outgroup to CVI in our sample. In  
1084 these analyses, there is evidence of a split at 40-50 kya, followed by secondary contact or low-  
1085 level migration between 10 and 20 kya. This initial split and secondary contact likely happened  
1086 on the continents between sampled Moroccan populations and an unsampled ‘ghost’ population  
1087 (the true closest continental outgroup to CVI). Source data are provided as a Source Data file.

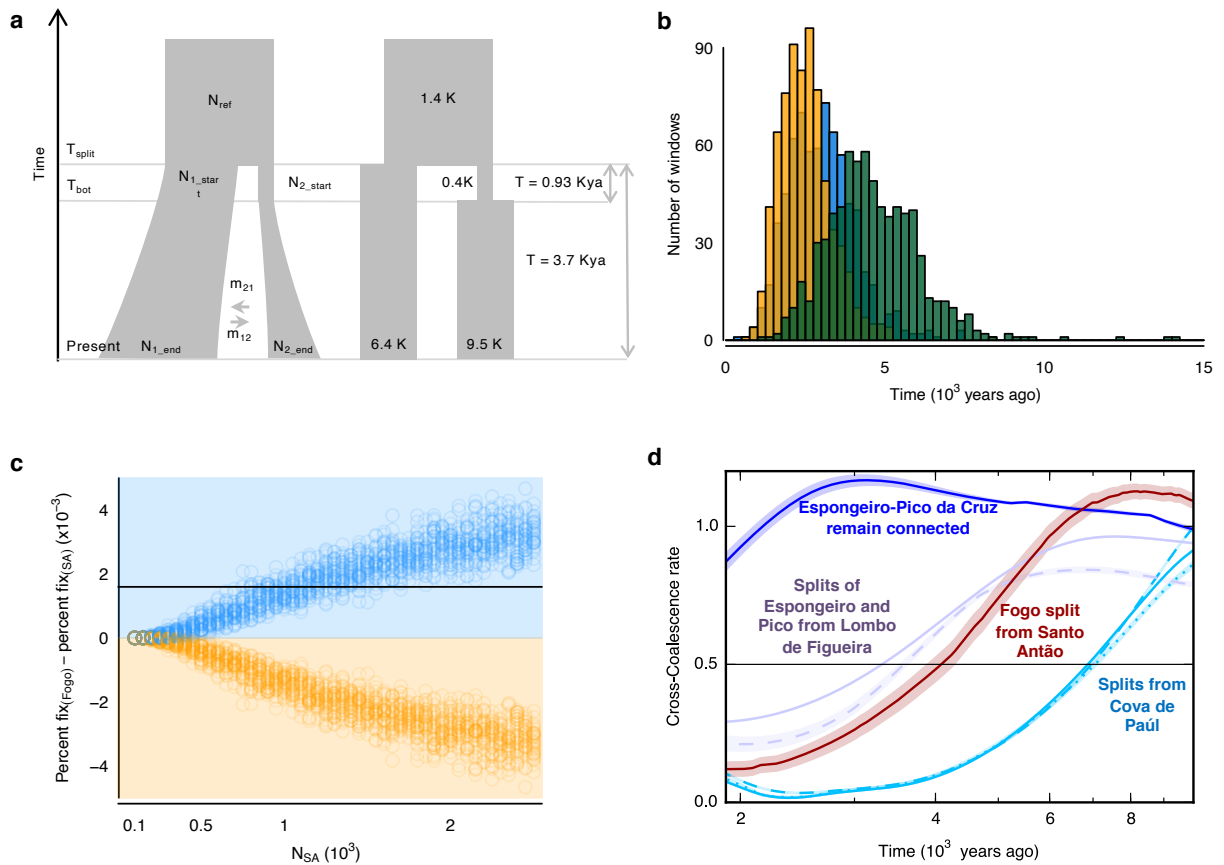

1088

1089 **Supplementary Figure 8. Modelling the dynamics within CVI.** **a**, Overview of models run in  
 1090 dadi (left) and best model (right).  $N_{ref}$ , size of the ancestral population;  $N_{1\_start}$ ,  $N_{2\_start}$ , size of  
 1091 population one and two at the split, respectively; only in the bottleneck model,  $N_{2\_start}$  remains  
 1092 constant for the duration of the bottleneck,  $T_{bot}$ ;  $N_{1\_end}$ ,  $N_{2\_end}$ , population sizes at present;  $T_{split}$ ,  
 1093 split time;  $m_{12}$ ,  $m_{21}$ , migration rates. **b**, Coalescence time within CVI across genomic windows  
 1094 (size=0.1Mbp) provides a lower bound for colonization timing at approximately 7 kya (95<sup>th</sup>  
 1095 percentile of coalescence times between islands). Comparisons within island are in blue (Santo  
 1096 Antão) and orange (Fogo), and comparisons between islands in green.



1097 fitted to observed data support a scenario in which Santo Antão was colonized prior to Fogo. The  
1098 percentage of fixed differences in Fogo compared to Santo Antão (SA) minus the percentage of  
1099 fixed differences in Santo Antão compared to Fogo (y-axis) varies as a function of which island  
1100 was colonized first (positive if Santo Antão, blue shade; negative if Fogo, orange shade) and of  
1101 the population size at the split (x-axis). Circles represent the results from simulations (n=1516):  
1102 blue if Santo Antão was colonized first, orange if Fogo was colonized first. Simulations in which  
1103 Santo Antão was colonized first with a population size of approximately 1K at the time of the  
1104 split, and in which Fogo was colonized later from Santo Antão, fit best the observed data  
1105 (horizontal black line). **d**, Cross-coalescence rates (CCR) among populations in Santo Antão as  
1106 inferred by MSMC-CCR. The estimated between-population split time corresponds to CCR=0.5  
1107 (horizontal line). Dark red shows CCR between Santo Antão and Fogo for reference. Lines  
1108 represent means across octets, shaded areas the 95% CI. Source data are provided as a Source  
1109 Data file.

1110

1111

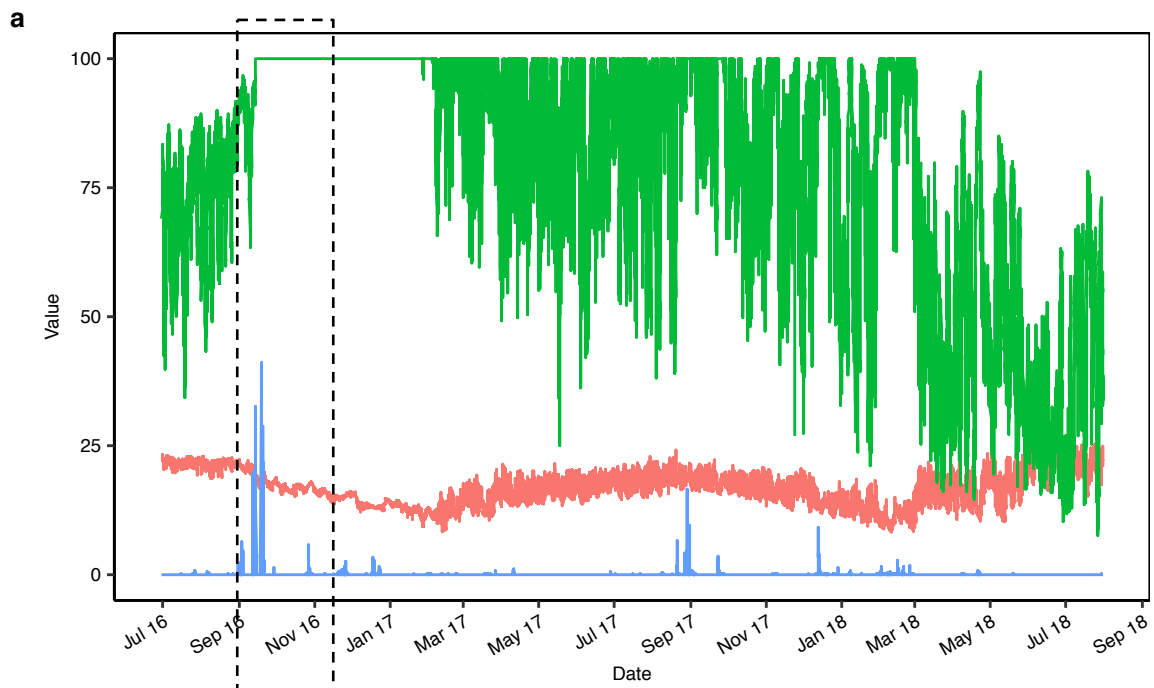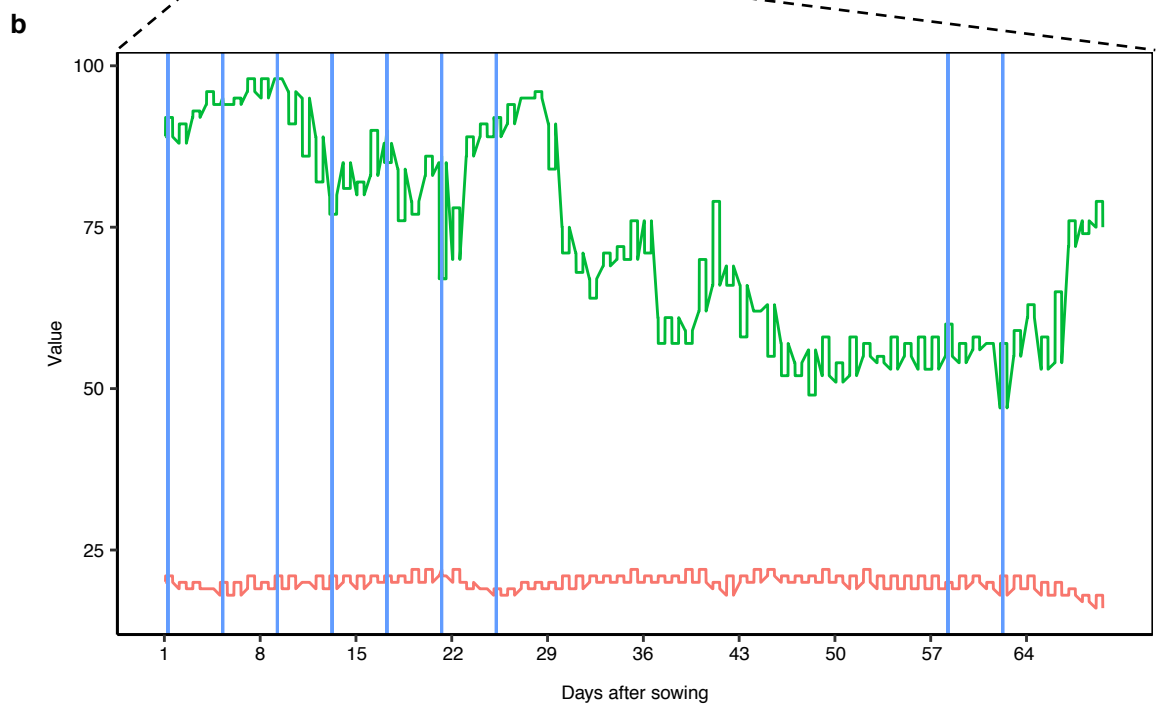

1113 **Supplementary Figure 9. Field climate data and simulated conditions. a,** Field site  
1114 measurements for precipitation (blue), humidity (green) and temperature (red) using loggers in  
1115 the Espongeiro field site over two years (July 2016 to July 2018). Y-axis shows values in mm for  
1116 precipitation, in percentage for humidity and in degrees Celsius for temperature. The dashed line  
1117 highlights the period of time simulated in panel b. **b,** Chamber conditions during the experiment  
1118 for humidity (green) and temperature (red). Watering is shown as blue vertical lines. Y-axis  
1119 shows values in percentage for humidity and in degrees Celsius for temperature, and x-axis  
1120 shows days after sowing (day 1: 1<sup>st</sup> Sept 2016). Source data are provided as a Source Data file.  
1121  
1122

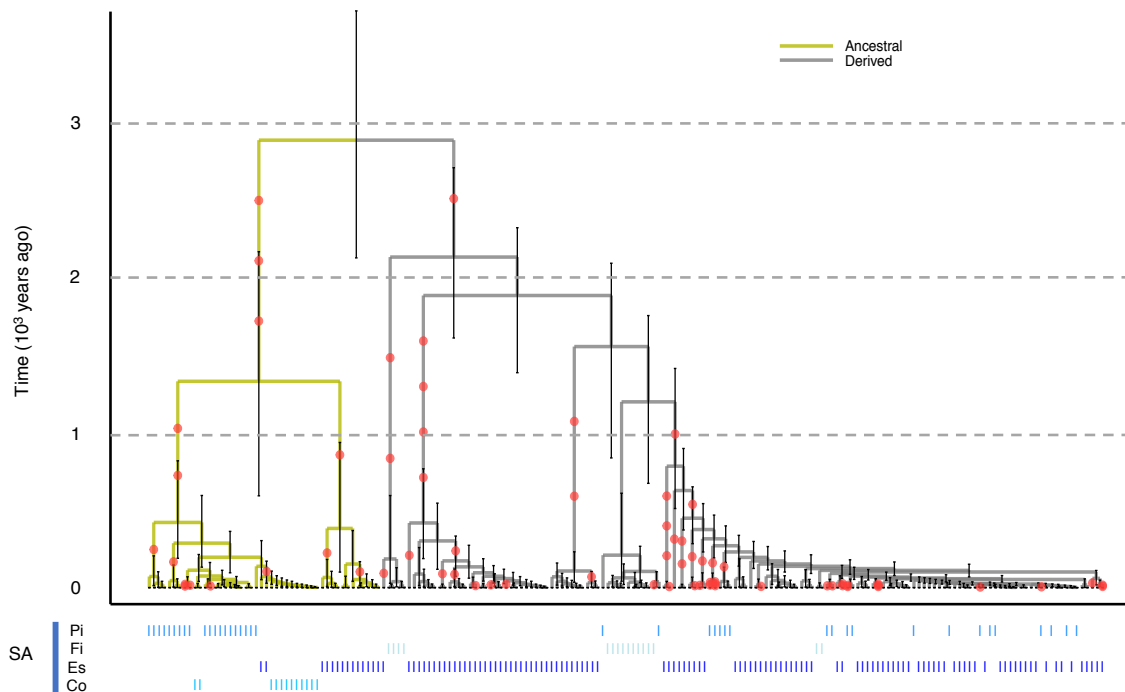

1123

1124 **Supplementary Figure 10. Evolutionary history of FRI K232X. Marginal genealogical tree**

1125 **estimated in RELATE for *FRI* (Chr4:269719).** Individuals are shown across the x-axis with

1126 their ancestral and derived carriers coloured in mustard and grey, respectively. The estimated

1127 time to coalescence is shown on the y-axis. Error bars indicate the 0.025 and 0.975 quantiles of

1128 the posterior density of coalescence times and are shown by the vertical black lines on the tree.

1129 Red dots represent mapped SNPs on their corresponding branches. Abbreviations: SA, Santo

1130 Antão; Pi, Pico da Cruz; Fi, Lombo de Figueira; Es, Espongeiro; and Co, Cova de Paúl. Source

1131 data are provided as a Source Data file.

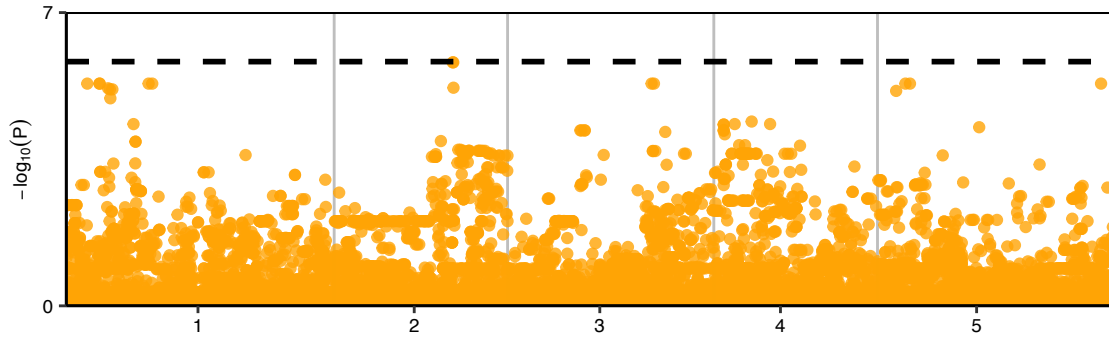

1132

1133 **Supplementary Figure 11. GWAS in Fogo.** Manhattan plot showing results of GWAS for  
1134 bolting time in the Fogo population (n=129). Dashed line represents the Bonferroni significance  
1135 threshold. Source data are provided as a Source Data file.

1136

1137

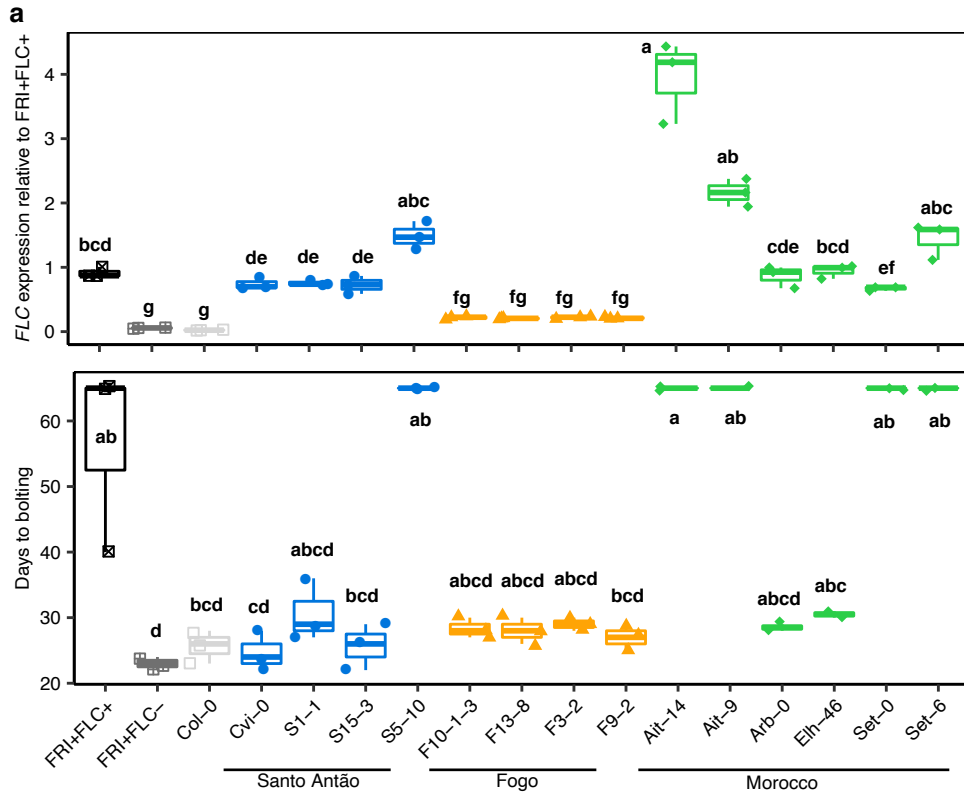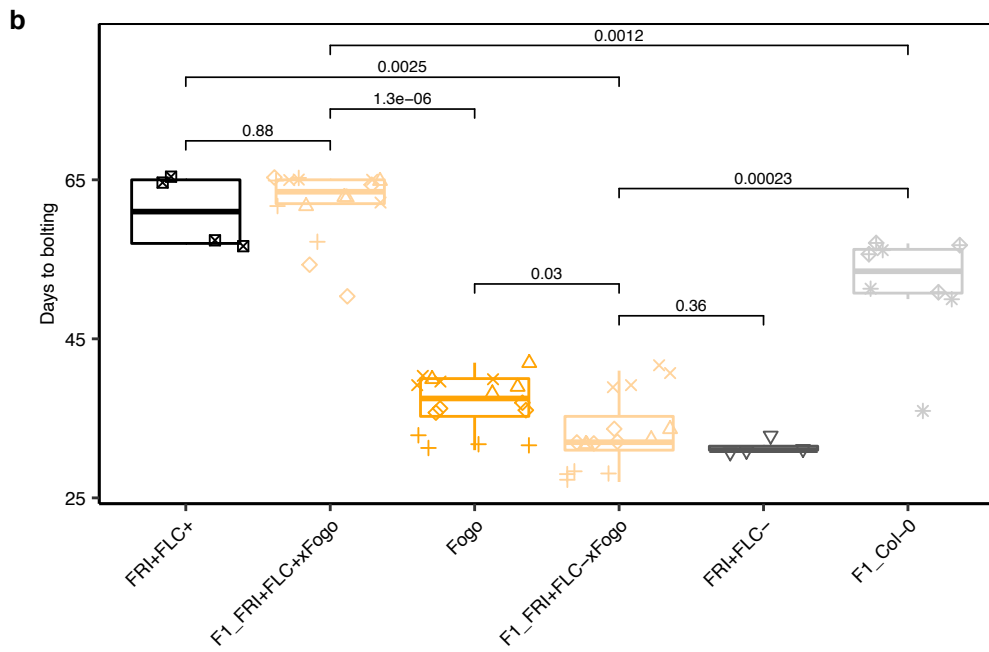

1139 **Supplementary Figure 12. Functional characterization of *FLC* nonsense mutation. a, *FLC***  
1140 effect on natural accessions from CVI and Morocco, and in mutant lines in the Col-0  
1141 background. FRI K232X segregates among the Santo Antão individuals shown. Cvi-0, S1-1 and  
1142 S15-3 carry the FRI 232X allele, while S5-10 carries the ancestral FRI K232 allele. All Fogo  
1143 individuals carry the derived FLC 3X allele. Top: *FLC* mRNA expression levels, with y-axis  
1144 showing the expression levels relative to functional FRI FLC (*FRI<sup>+</sup>FLC<sup>+</sup>*). Bottom: Days to  
1145 bolting (shown on the y-axis). In both panels, dots represent replicates per genotype (n=3), and  
1146 letters above boxplot represent statistical groups from Kruskal Wallis tests. The central line in  
1147 the boxplots represents the median, box limits are first and third quartiles and whiskers the 95%  
1148 CI. **b, Bolting time differences in the complementation test. Each dot represents one replicate per**  
1149 genotype (n=4), and different symbols represent different accessions, with symbols matching  
1150 between Fogo and F1 for the parental lines. The central line in the boxplots represents the  
1151 median, box limits are first and third quartiles and whiskers the 95% CI. *P*-values are shown for  
1152 two-sided Wilcoxon test. Throughout the figure, *FRI<sup>+</sup>FLC<sup>+</sup>* represents the accession Col-0 *FRI*-  
1153 *Sf2*, with both functional FRI and FLC; *FRI<sup>+</sup>FLC<sup>-</sup>* represents the accession Col-0 *FRI*-*Sf2 flc-3*,  
1154 carrying a functional FRI and a non-functional FLC; F1\_*FRI<sup>+</sup>FLC<sup>+</sup>*xFogo represents F1  
1155 individuals from crosses between *FRI<sup>+</sup>FLC<sup>+</sup>* and Fogo accessions; F1\_*FRI<sup>+</sup>FLC<sup>-</sup>*xFogo  
1156 represents F1 individuals from crosses between *FRI<sup>+</sup>FLC<sup>-</sup>* and Fogo accessions; F1\_Col-0  
1157 represents F1 individuals from crosses between *FRI<sup>+</sup>FLC<sup>+</sup>* and *FRI<sup>+</sup>FLC<sup>-</sup>*. Comparisons *p*-values:  
1158 *FRI<sup>+</sup>FLC<sup>+</sup>* vs. F1\_*FRI<sup>+</sup>FLC<sup>+</sup>*xFogo = 0.88, F1\_*FRI<sup>+</sup>FLC<sup>+</sup>*xFogo vs. Fogo =  $1.3 \times 10^{-6}$ , *FRI<sup>+</sup>FLC<sup>+</sup>*  
1159 vs. F1\_*FRI<sup>+</sup>FLC<sup>-</sup>*xFogo = 0.0025, F1\_*FRI<sup>+</sup>FLC<sup>-</sup>*xFogo vs. F1\_Col-0 = 0.0012, Fogo vs,

1160  $F1\_FRI+FLC \times Fogo = 0.03$ ,  $F1\_FRI+FLC \times Fogo$  vs.  $FRI+FLC = 0.36$ ,  $F1\_FRI+FLC \times Fogo$  vs.  
1161  $F1\_Col-0 = 0.00023$ . For both panels, boxplots show median (centre), 1<sup>st</sup> and 3<sup>rd</sup> quartiles (lower  
1162 and upper bound, respectively). Whiskers represent 95% CI. Source data are provided as a  
1163 Source Data file.



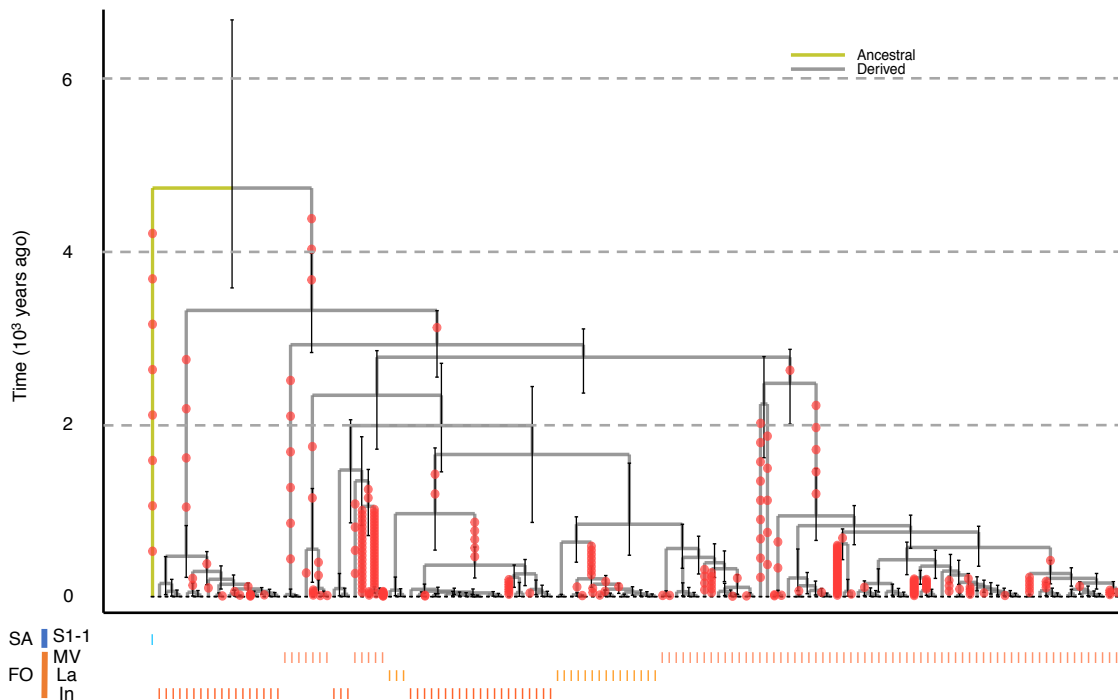

1164

1165 **Supplementary Figure 13. Marginal genealogical tree estimated in RELATE for FLC 3X**  
 1166 **(Chr5: 3179333).** Individuals are shown across the x-axis with the ancestral and derived carriers  
 1167 coloured in mustard and grey, respectively. The estimated coalescence times are shown on the y-  
 1168 axis. Error bars indicate the 0.025 and 0.975 quantiles of the posterior density of coalescence  
 1169 times and are shown by the vertical black lines on the tree. Red dots represent mapped SNPs on  
 1170 their corresponding branches. Abbreviations: FO, Fogo; MV, Monte Velha; La, Lava; In,  
 1171 Inferno; SA, Santo Antão; and S1-1 accession from Lombo de Figueira subpopulation in Santo  
 1172 Antão (used as the outgroup). Source data are provided as a Source Data file.

1173

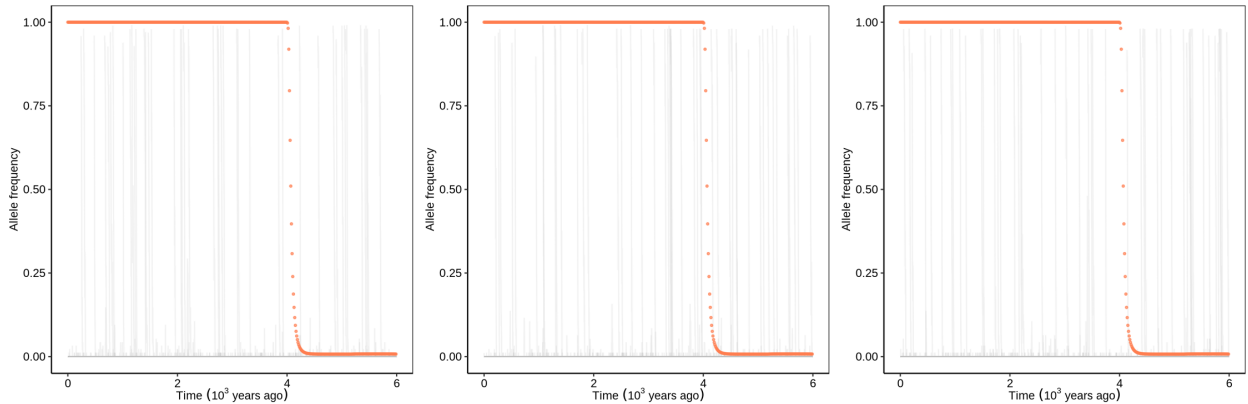

1174

1175 **Supplementary Figure 14. Allele frequency trajectories of variants arising in a simulated**  
 1176 **Fogo colonizing population.** Simulated allele frequency trajectories of variants arising in Fogo  
 1177 (starting population size=48) with selection coefficients of 9.2% (the estimate from CLUES with  
 1178 variable  $N_e$ ). Each grey line represents a simulated trajectory, and the orange line represents the  
 1179 trajectory inferred from CLUES for FLC R3X, across selfing rates (left to right: 90%, 95%,  
 1180 99%).

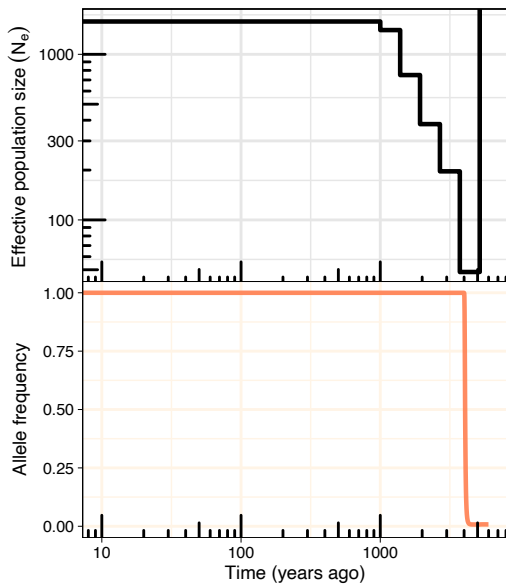

1181  
1182 **Supplementary Figure 15. FLC 3X appeared in Fogo soon after colonization, and rose in**  
1183 **frequency rapidly, consistent with evolutionary rescue.** Top: reconstructed change in effective  
1184 population size over time in Fogo. Bottom: inferred allele frequency trajectory of FLC 3X.  
1185 Source data are provided as a Source Data file.  
1186

1187 **Supplementary Table 1. Nucleotide diversity ( $\theta$ ) in Cape Verde, North Africa and Eurasia.**

|                    | $\theta_{\pi}^1$      | $\theta_w^2$          |
|--------------------|-----------------------|-----------------------|
| CVI                | $6.53 \times 10^{-5}$ | $1.48 \times 10^{-4}$ |
| Santo Antão        | $5.60 \times 10^{-5}$ | $7.59 \times 10^{-5}$ |
| Fogo               | $4.51 \times 10^{-5}$ | $8.93 \times 10^{-5}$ |
| Morocco            | $5.38 \times 10^{-3}$ | $5.56 \times 10^{-3}$ |
| High Atlas         | $3.21 \times 10^{-3}$ | $2.72 \times 10^{-3}$ |
| North Middle Atlas | $2.74 \times 10^{-3}$ | $2.27 \times 10^{-3}$ |
| South Middle Atlas | $3.53 \times 10^{-3}$ | $3.41 \times 10^{-3}$ |
| Rif                | $4.69 \times 10^{-3}$ | $4.00 \times 10^{-3}$ |
| Eurasia            | $4.21 \times 10^{-3}$ | $6.42 \times 10^{-3}$ |

1188 <sup>1</sup>  $\theta_{\pi}$ : Tajima's estimator of  $\theta$

1189 <sup>2</sup>  $\theta_w$ : Watterson's estimator of  $\theta$ .

1190

1191 **Supplementary Table 2. Modelling of the split between Morocco and CVI with dadi.**

| Model                 | MaxLik <sup>1</sup> | AIC <sup>2</sup> | Theta <sup>3</sup> | Nref <sup>4</sup> | N1_start <sup>5</sup> | N2_start <sup>6</sup> | N1_end <sup>7</sup> | N2_end <sup>8</sup> | Tsplit <sup>9</sup> | m12 <sup>10</sup> | m21 <sup>11</sup> | Tbot <sup>12</sup> |
|-----------------------|---------------------|------------------|--------------------|-------------------|-----------------------|-----------------------|---------------------|---------------------|---------------------|-------------------|-------------------|--------------------|
| simpleSplit           | -461                | 928              | 1878               | 239122            | 447059                | 2876                  | x                   | x                   | 69802               | x                 | x                 | x                  |
| Exp                   | -376                | 758              | 2039               | 259618            | 258831                | 787                   | 555769              | 11967               | 55731               | x                 | x                 | x                  |
| im                    | -1051               | 2112             | 1727               | 219908            | 4700                  | 215208                | 447976              | 1468                | 1397384             | 7,96E-07          | 5,54E-06          | x                  |
| bottleneck            | -396                | 800              | 1849               | 235505            | 526073                | 253                   | 526073              | 6652                | 50736               | x                 | x                 | 17041              |
| bottleneck-<br>2sided | -348                | 708              | 1943               | 247442            | 565501                | 1907                  | 324697              | 12233               | 49668               | x                 | x                 | 43517              |

1192 <sup>1</sup> MaxLik: maximum log-likelihood obtained across dadi runs

1193 <sup>2</sup> AIC: Akaike Information Criterion

1194 <sup>3</sup> Theta: population mutation parameter inferred in dadi

1195 <sup>4</sup> Nref: effective size of the ancestral population

1196 <sup>5</sup> N1\_start: effective size of population one at the split, respectively. In the bottleneck models, these sizes remain constant for the  
1197 duration of the bottleneck

1198 <sup>6</sup> N2\_start: effective size of population two at the split, respectively. In the bottleneck models, these sizes remain constant for the  
1199 duration of the bottleneck

1200 <sup>7</sup> N1\_end: effective population size of population 1 at present

1201 <sup>8</sup> N2\_end: effective population size of population 2 at present

1202 <sup>9</sup> Tsplit: split time

1203 <sup>10</sup> m12: migration rate from population 1 to 2

1204 <sup>11</sup> m21: migration rate from population 2 to 1

1205 <sup>12</sup> Tbot: duration of the bottleneck

1206 **Supplementary Table 3. Modelling of the split between Santo Antão and Fogo with dadi.**

| Model       | MaxLik <sup>1</sup> | AIC <sup>2</sup> | Theta <sup>3</sup> | Nref <sup>4</sup> | N1_start <sup>5</sup> | N2_start <sup>6</sup> | N1_end <sup>7</sup> | N2_end <sup>8</sup> | Tsplit <sup>9</sup> | m12 <sup>10</sup> | m21 <sup>11</sup> | Tbot <sup>12</sup> |
|-------------|---------------------|------------------|--------------------|-------------------|-----------------------|-----------------------|---------------------|---------------------|---------------------|-------------------|-------------------|--------------------|
| simpleSplit | -389                | 784              | 53                 | 776               | 5487                  | 7750                  | x                   | x                   | 4754                | x                 | x                 | x                  |
| Exp         | -313                | 635              | 142                | 2067              | 1579                  | 488                   | 9268                | 17166               | 3715                | x                 | x                 | x                  |
| im          | -304                | 620              | 127                | 1841              | 1427                  | 413                   | 9186                | 17069               | 3995                | 4,28E-06          | 6,03E-07          | x                  |
| bottleneck  | -282                | 574              | 99                 | 1435              | 6434                  | 397                   | 6434                | 9511                | 3685                | x                 | x                 | 931                |

1207 <sup>1</sup> MaxLik: maximum log-likelihood obtained across dadi runs

1208 <sup>2</sup> AIC: Akaike Information Criterion

1209 <sup>3</sup> Theta: population mutation parameter inferred in dadi

1210 <sup>4</sup> Nref: effective size of the ancestral population

1211 <sup>5</sup> N1\_start: effective size of population one at the split, respectively. In the bottleneck models, these sizes remain constant for the  
1212 duration of the bottleneck

1213 <sup>6</sup> N2\_start: effective size of population two at the split, respectively. In the bottleneck models, these sizes remain constant for the  
1214 duration of the bottleneck

1215 <sup>7</sup> N1\_end: effective population size of population 1 at present

1216 <sup>8</sup> N2\_end: effective population size of population 2 at present

1217 <sup>9</sup> Tsplit: split time

1218 <sup>10</sup> m12: migration rate from population 1 to 2

1219 <sup>11</sup> m21: migration rate from population 2 to 1

1220 <sup>12</sup> Tbot: duration of the bottleneck

1221

1222 **Supplementary Table 4. Niche modeling with MaxEnt for the Moroccan region.**

| <b>Variable</b> | <b>Variable Description</b>                          | <b>Percent contribution</b> | <b>Permutation importance</b> |
|-----------------|------------------------------------------------------|-----------------------------|-------------------------------|
| gs              | Length of the growing season in months               | 38,7                        | 28,5                          |
| bio3            | Isothermality (BIO2/BIO7) ( $\times 100$ )           | 20,2                        | 43                            |
| bio6            | Min Temperature of Coldest Month                     | 18,4                        | 11,1                          |
| bio5            | Max Temperature of Warmest Month                     | 14,5                        | 14,7                          |
| bio7            | Temperature Annual Range (BIO5-BIO6)                 | 8                           | 2,2                           |
| bio15           | Precipitation Seasonality (Coefficient of Variation) | 0,1                         | 0,5                           |
| bio8            | Mean Temperature of Wettest Quarter                  | 0,1                         | 0                             |

1223

1224 **Supplementary Table 5. Model statistics for stepwise regression analysis.** The best model  
 1225 (nvmax = 2) identifies FRI and GI as the main contributors to fitness.

| nvmax <sup>1</sup> | RMSE <sup>2</sup> | Rsquared <sup>3</sup> | MAE <sup>4</sup> | RMSE SD <sup>5</sup> | Rsquared SD | MAE SD   |
|--------------------|-------------------|-----------------------|------------------|----------------------|-------------|----------|
| 1                  | 486,6842          | 0,07352437            | 334,8117         | 62,62452             | 0,03778863  | 30,72803 |
| 2                  | 446,8749          | 0,2203883             | 311,2951         | 61,00429             | 0,05345926  | 29,37821 |
| 3                  | 450,3681          | 0,20845137            | 311,7726         | 60,74491             | 0,06327362  | 30,66107 |
| 4                  | 452,386           | 0,20253587            | 309,7203         | 60,97669             | 0,05890219  | 32,23143 |
| 5                  | 456,163           | 0,1890078             | 316,4986         | 61,53983             | 0,06234999  | 33,2347  |
| 6                  | 458,9121          | 0,1796467             | 319,3417         | 61,4938              | 0,06423225  | 34,29386 |
| 7                  | 447,3371          | 0,22692613            | 305,0492         | 58,34149             | 0,0512004   | 31,43282 |

1226 <sup>1</sup> nvmax: number of variables in the model

1227 <sup>2</sup> RMSE: root mean square error

1228 <sup>3</sup> Rsquared: squared value for R (correlation between the observed and predicted values)

1229 <sup>4</sup> MAE: mean absolute error

1230 <sup>5</sup> SD, standard deviation

1231



1232 **Supplementary Table 6. Inferred selection coefficients over time for FRI 232X.**

| <b>epoch</b> | <b><i>s</i></b> |
|--------------|-----------------|
| 0 - 2000     | 0,00112         |
| 2000 - 4000  | 0,04558         |

1233

1234

1235 **Supplementary Table 7. Inferred selection coefficients for FLC 3X.**

| <b>epoch</b> | <b><math>S^1</math></b> |
|--------------|-------------------------|
| 0 - 2000     | -0,99679                |
| 2000 - 4000  | -0,57297                |
| 4000 - 6000  | 0,09273                 |

1236 <sup>1</sup>The timeframe of fixation corresponds with the epoch 4-6 kya. After fixation of the allele  
1237 negative selection coefficients are generated.

1238 **Supplementary Table 8. Simulated trajectories.** Each row corresponds to the summary of the simulations (n=200).

| <b>selection coefficient (s)</b> | <b>Selfing rate</b> | <b>% fixed<sup>1</sup></b> | <b>Mean gen. to fixation<sup>2</sup></b> | <b>% not fixed<sup>3</sup></b> | <b>Mean gen. to loss<sup>4</sup></b> | <b>% no mutations<sup>5</sup></b> | <b>Mean gen. to 1st segregating potentially adaptive variant<sup>6</sup></b> | <b>Mean gen. to adapt<sup>7</sup></b> |
|----------------------------------|---------------------|----------------------------|------------------------------------------|--------------------------------|--------------------------------------|-----------------------------------|------------------------------------------------------------------------------|---------------------------------------|
| 0,0927                           | 0,9                 | 13,5                       | 61,37                                    | 69,5                           | 3,48                                 | 17                                | 2061,63                                                                      | 2750,7                                |
| 0,0927                           | 0,95                | 16,00                      | 64,87                                    | 67,5                           | 3,02                                 | 16,5                              | 1980,04                                                                      | 3210,21                               |
| 0,0927                           | 0,99                | 16,00                      | 54,71                                    | 67,5                           | 3,19                                 | 16,5                              | 2002,59                                                                      | 3000,46                               |
| 0,23                             | 0,9                 | 21,5                       | 34,25                                    | 58,5                           | 2,39                                 | 20                                | 2096,52                                                                      | 3224,41                               |
| 0,23                             | 0,95                | 23,5                       | 33,12                                    | 61,5                           | 2,22                                 | 15                                | 2201,36                                                                      | 2714,68                               |
| 0,23                             | 0,99                | 24,00                      | 33,25                                    | 52,00                          | 2,16                                 | 24                                | 2203,79                                                                      | 2666,25                               |

1239 <sup>1</sup>% fixed: the percentage of simulations where an adaptive variant arose and fixed in the population

1240 <sup>2</sup>Mean gen. to fixation: the mean generations for the variant to fix after arising

1241 <sup>3</sup>% not fixed: the percentage of simulations where a potentially adaptive variant arose but did not fix

1242 <sup>4</sup>Mean gen. to loss: mean number of generations for a potentially adaptive variant to be lost, given that it is lost

1243 <sup>5</sup>% no mutations: the percentage of simulations where no potentially adaptive mutation arose

1244 <sup>6</sup>Mean gen. to 1st segregating potentially adaptive variant: mean number of generations for the first potentially adaptive variant to occur

1245  
1246 <sup>7</sup>Mean gen to adapt: the mean number of generations for an adaptive variant to fix given that adaptation occurred, note that this differs  
1247 from the sum of columns H and D because in some cases potentially adaptive mutations are lost before an adaptive variant eventually  
1248 fixes.

1249 **Supplementary Table 9. Primers used in this study.**

| <b>OligoName</b> | <b>OligoSequence</b>       |
|------------------|----------------------------|
| FLC_RqPCR1_F     | CCGAACTCATGTTGAAGCTTGTTGAG |
| FLC_RqPCR1_R     | CGGAGATTTGTCCAGCAGGTG      |
| PP2A_qPCR2_F     | AAATACGCCCAACGAACAAA       |
| PP2A_qPCR2_R     | CAGCAACGAATTGTGTTTGG       |
| Oligo(dT)        | TTTTTTTTTTTTTTTTTTT        |

1250

1251 **Supplementary Table 10. Coalescence rate and effective population size (Ne) over time**  
 1252 **inferred in RELATE for FRI 232X in Santo Antão and with the CVI-Ancestor individual,**  
 1253 **used with the --coal argument in CLUES.**

| <b>time</b> | <b>haploid.coalescence.rate</b> | <b>pop_size</b> |
|-------------|---------------------------------|-----------------|
| 0           | 1,61E-04                        | 3113,65462      |
| 1000        | 2,48E-04                        | 2019,43504      |
| 1389,5      | 6,70E-04                        | 745,886807      |
| 1930,7      | 8,03E-04                        | 622,579721      |
| 2682,7      | 6,21E-05                        | 8048,17315      |
| 3727,59     | 1,16E-05                        | 43164,8465      |
| 5179,48     | 0,00E+00                        | Inf             |
| 7196,86     | 0,00E+00                        | Inf             |
| 10000       | 2,60E-06                        | 192187,206      |
| 13895       | 1,06E-05                        | 46969,0849      |
| 19307       | 0,00E+00                        | Inf             |
| 26827       | 4,67E-04                        | 1069,83681      |
| 37275,9     | 4,67E-04                        | 1069,83681      |
| 51794,8     | 4,67E-04                        | 1069,83681      |
| 71968,6     | 4,67E-04                        | 1069,83681      |
| 1,00E+05    | 4,67E-04                        | 1069,83681      |
| 138950      | 4,67E-04                        | 1069,83681      |
| 193070      | 4,67E-04                        | 1069,83681      |
| 268270      | 4,67E-04                        | 1069,83681      |
| 372759      | 4,67E-04                        | 1069,83681      |
| 517948      | 4,67E-04                        | 1069,83681      |
| 719686      | 4,67E-04                        | 1069,83681      |
| 1,00E+06    | 4,67E-04                        | 1069,83681      |
| 1389500     | 4,67E-04                        | 1069,83681      |
| 1930700     | 4,67E-04                        | 1069,83681      |
| 2682700     | 4,67E-04                        | 1069,83681      |
| 3727590     | 4,67E-04                        | 1069,83681      |
| 5179480     | 4,67E-04                        | 1069,83681      |
| 7196860     | 4,67E-04                        | 1069,83681      |
| 1,00E+07    | 4,67E-04                        | 1069,83681      |
| 1,00E+07    | 4,67E-04                        | 1069,83681      |

1254

1255 **Supplementary Table 11. Coalescence rate and effective population size (Ne) over time**  
 1256 **inferred from genome-wide data in RELATE and used with the --coal argument in**  
 1257 **CLUES.**

| <b>time</b> | <b>haploid.coalescence.rate</b> | <b>pop_size</b> |
|-------------|---------------------------------|-----------------|
| 0           | 1,92E-04                        | 2604,0446       |
| 1000        | 3,88E-05                        | 12870,046       |
| 1389,5      | 1,07E-04                        | 4662,74374      |
| 1930,7      | 2,30E-04                        | 2177,89955      |
| 2682,7      | 1,17E-03                        | 427,785525      |
| 3727,59     | 1,18E-03                        | 424,358158      |
| 5179,48     | 1,36E-03                        | 367,395825      |
| 7196,86     | 1,07E-01                        | 4,68239326      |
| 10000       | 1,07E-01                        | 4,68239326      |
| 13895       | 1,07E-01                        | 4,68239326      |
| 19307       | 1,07E-01                        | 4,68239326      |
| 26827       | 1,07E-01                        | 4,68239326      |
| 37275,9     | 1,07E-01                        | 4,68239326      |
| 51794,8     | 1,07E-01                        | 4,68239326      |
| 71968,6     | 1,07E-01                        | 4,68239326      |
| 1,00E+05    | 1,07E-01                        | 4,68239326      |
| 138950      | 1,07E-01                        | 4,68239326      |
| 193070      | 1,07E-01                        | 4,68239326      |
| 268270      | 1,07E-01                        | 4,68239326      |
| 372759      | 1,07E-01                        | 4,68239326      |
| 517948      | 1,07E-01                        | 4,68239326      |
| 719686      | 1,07E-01                        | 4,68239326      |
| 1,00E+06    | 1,07E-01                        | 4,68239326      |
| 1389500     | 1,07E-01                        | 4,68239326      |
| 1930700     | 1,07E-01                        | 4,68239326      |
| 2682700     | 1,07E-01                        | 4,68239326      |
| 3727590     | 1,07E-01                        | 4,68239326      |
| 5179480     | 1,07E-01                        | 4,68239326      |
| 7196860     | 1,07E-01                        | 4,68239326      |
| 1,00E+07    | 1,07E-01                        | 4,68239326      |
| 1,00E+07    | 1,07E-01                        | 4,68239326      |

1258

1259 **Supplementary References**

- 1260 1. Fick, S. E. & Hijmans, R. J. WorldClim2: new 1-km spatial resolution climate surfaces for  
1261 global land areas. *Int. J. Climatol.* **37**, 4302–4315 (2017).
- 1262 2. Antonio Trabucco & Robert J. Zomer. Global aridity index and potential evapo-  
1263 transpiration (ET0) climate database v2. (2019).
- 1264 3. Lasky, J. R. *et al.* Characterizing genomic variation of *Arabidopsis thaliana*: the roles of  
1265 geography and climate. *Mol. Ecol.* **21**, 5512–5529 (2012).
- 1266 4. Durvasula, A. *et al.* African genomes illuminate the early history and transition to selfing in  
1267 *Arabidopsis thaliana*. *Proc Natl Acad Sci USA* **114**, 5213 (2017).
- 1268 5. Ossowski, S. *et al.* Sequencing of natural strains of *Arabidopsis thaliana* with short reads.  
1269 *Genome Res.* **18**, 2024–2033 (2008).
- 1270 6. Li, H. & Durbin, R. Fast and accurate short read alignment with Burrows-Wheeler  
1271 transform. *Bioinforma. Oxf. Engl.* **25**, 1754–1760 (2009).
- 1272 7. Schubert, M., Lindgreen, S. & Orlando, L. AdapterRemoval v2: rapid adapter trimming,  
1273 identification, and read merging. *BMC Res. Notes* **9**, 88 (2016).
- 1274 8. McKenna, A. *et al.* The genome analysis toolkit: A MapReduce framework for analyzing  
1275 next-generation DNA sequencing data. *Genome Res.* **20**, 1297–1303 (2010).
- 1276 9. Li, H. *et al.* The sequence alignment/Map format and SAMtools. *Bioinformatics* **25**, 2078–  
1277 2079 (2009).

- 1278 10. Danecek, P. *et al.* Twelve years of SAMtools and BCFtools. *GigaScience* **10**, giab008  
1279 (2021).
- 1280 11. Danecek, P. *et al.* The variant call format and VCFtools. *Bioinformatics* **27**, 2156–2158  
1281 (2011).
- 1282 12. Tang, C. *et al.* The evolution of selfing in *Arabidopsis thaliana*. *Science* **317**, 1070–1072  
1283 (2007).
- 1284 13. Dwyer, K. G. *et al.* Molecular characterization and evolution of self-incompatibility genes  
1285 in *Arabidopsis thaliana*: the case of the Sc haplotype. *Genetics* **193**, 985–994 (2013).
- 1286 14. Salomé, P. A. *et al.* Genetic architecture of flowering-time variation in *Arabidopsis*  
1287 *thaliana*. *Genetics* **188**, 421–433 (2011).
- 1288 15. Purcell, S. *et al.* PLINK: a tool set for whole-genome association and population-based  
1289 linkage analyses. *Am J Hum Genet* **81**, 559–575 (2007).
- 1290 16. Schiffels, S. & Durbin, R. Inferring human population size and separation history from  
1291 multiple genome sequences. *Nat Genet* **46**, 919–925 (2014).
- 1292 17. Gutenkunst, R. N., Hernandez, R. D., Williamson, S. H. & Bustamante, C. D. Inferring the  
1293 joint demographic history of multiple populations from multidimensional SNP frequency  
1294 data. *PLOS Genet.* **5**, e1000695 (2009).
- 1295 18. Kelleher, J., Etheridge, A. M. & McVean, G. Efficient coalescent simulation and  
1296 genealogical analysis for large sample sizes. *PLOS Comput. Biol.* **12**, e1004842 (2016).



- 1297 19. Novikova, P. Y. *et al.* Sequencing of the genus *Arabidopsis* identifies a complex history of  
1298 nonbifurcating speciation and abundant trans-specific polymorphism. *Nat. Genet.* **48**, 1077–  
1299 1082 (2016).
- 1300 20. Stamatakis, A. RAxML version 8: a tool for phylogenetic analysis and post-analysis of  
1301 large phylogenies. *Bioinforma. Oxf. Engl.* **30**, 1312–1313 (2014).
- 1302 21. Drummond, A. J., Suchard, M. A., Xie, D. & Rambaut, A. Bayesian phylogenetics with  
1303 BEAUti and the BEAST 1.7. *Mol. Biol. Evol.* **29**, 1969–1973 (2012).
- 1304 22. Hohmann, N., Wolf, E. M., Lysak, M. A. & Koch, M. A. A time-calibrated road map of  
1305 Brassicaceae species radiation and evolutionary history. *Plant Cell* **27**, 2770–2784 (2015).
- 1306 23. Drummond, A. J., Ho, S. Y. W., Phillips, M. J. & Rambaut, A. Relaxed phylogenetics and  
1307 dating with confidence. *PLoS Biol.* **4**, e88 (2006).
- 1308 24. Gernhard, T. The conditioned reconstructed process. *J. Theor. Biol.* **253**, 769–778 (2008).
- 1309 25. Haller, B. C. & Messer, P. W. SLiM 3: forward genetic simulations beyond the Wright-  
1310 Fisher model. *Mol Biol Evol* **36**, 632–637 (2019).
- 1311 26. Phillips, S. J., Anderson, R. P. & Schapire, R. E. Maximum entropy modeling of species  
1312 geographic distributions. *Ecol. Model.* **190**, 231–259 (2006).
- 1313 27. Brennan, A. C. *et al.* The genetic structure of *Arabidopsis thaliana* in the south-western  
1314 Mediterranean range reveals a shared history between North Africa and southern Europe.  
1315 *BMC Plant Biol.* **14**, 17 (2014).

- 1316 28. Cingolani, P. *et al.* A program for annotating and predicting the effects of single nucleotide  
1317 polymorphisms, SnpEff. *Fly (Austin)* **6**, 80–92 (2012).
- 1318 29. Tataru, P. & Bataillon, T. polyDFE: inferring the distribution of fitness effects and  
1319 properties of beneficial mutations from polymorphism data. *Methods Mol Biol* **2090**, 125–  
1320 146 (2020).
- 1321 30. W. Lobin. The occurrence of *Arabidopsis thaliana* in the Cape Verde Islands. in vol. 20  
1322 119–123 (1983).
- 1323 31. Alonso-Blanco, C. *et al.* Development of an AFLP based linkage map of Ler, Col and Cvi  
1324 *Arabidopsis thaliana* ecotypes and construction of a Ler/Cvi recombinant inbred line  
1325 population: AFLP based linkage map of *Arabidopsis*. *Plant J.* **14**, 259–271 (1998).
- 1326 32. Simon, M. *et al.* Quantitative trait loci mapping in five new large recombinant inbred line  
1327 populations of *Arabidopsis thaliana* genotyped with consensus single-nucleotide  
1328 polymorphism markers. *Genetics* **178**, 2253–2264 (2008).
- 1329 33. Keurentjes, J. J. B. *et al.* Development of a near-isogenic line population of *Arabidopsis*  
1330 *thaliana* and comparison of mapping power with a recombinant inbred line population.  
1331 *Genetics* **175**, 891–905 (2007).
- 1332 34. Alonso-Blanco, C., El-Assal, S. E., Coupland, G. & Koornneef, M. Analysis of natural  
1333 allelic variation at flowering time loci in the Landsberg erecta and Cape Verde Islands  
1334 ecotypes of *Arabidopsis thaliana*. *Genetics* **149**, 749–764 (1998).

- 1335 35. Alonso-Blanco, C. *et al.* Genetic and molecular analyses of natural variation indicate CBF2  
1336 as a candidate gene for underlying a freezing tolerance quantitative trait locus in  
1337 *Arabidopsis*. *Plant Physiol* **139**, 1304–1312 (2005).
- 1338 36. Alonso-Blanco, C., Vries, H. B., Hanhart, C. J. & Koornneef, M. Natural allelic variation at  
1339 seed size loci in relation to other life history traits of *Arabidopsis thaliana*. *PNAS* **96**, 4710–  
1340 4717 (1999).
- 1341 37. Bandaranayake, C. K., Koumproglou, R., Wang, X. Y., Wilkes, T. & Kearsey, M. J. QTL  
1342 analysis of morphological and developmental traits in the Ler × Cvi population of  
1343 *Arabidopsis thaliana*. *Euphytica* **137**, 361–371 (2004).
- 1344 38. Bentsink, L. *et al.* Genetic analysis of seed-soluble oligosaccharides in relation to seed  
1345 storability of *Arabidopsis*. *Plant Physiol.* **124**, 1595–1604 (2000).
- 1346 39. Bentsink, L. *et al.* Natural variation for seed dormancy in *Arabidopsis* is regulated by  
1347 additive genetic and molecular pathways. *PNAS* **107**, 4264–4269 (2010).
- 1348 40. Bentsink, L., Yuan, K., Koornneef, M. & Vreugdenhil, D. The genetics of phytate and  
1349 phosphate accumulation in seeds and leaves of *Arabidopsis thaliana*, using natural  
1350 variation. *Theor Appl Genet* **106**, 1234–1243 (2003).
- 1351 41. Borevitz, J. O. *et al.* Quantitative trait loci controlling light and hormone response in two  
1352 accessions of *Arabidopsis thaliana*. *Genetics* **160**, 683–696 (2002).

- 1353 42. Botto, J. F., Alonso-Blanco, C., Garzarón, I., Sánchez, R. A. & Casal, J. J. The Cape Verde  
1354 Islands allele of Cryptochrome 2 enhances cotyledon unfolding in the absence of blue light  
1355 in *Arabidopsis*. *Plant Physiol.* **133**, 1547–1556 (2003).
- 1356 43. Buescher, E. *et al.* Natural genetic variation in selected populations of *Arabidopsis thaliana*  
1357 is associated with ionomic differences. *PLOS ONE* **5**, e11081 (2010).
- 1358 44. Coneva, V. & Chitwood, D. H. Genetic and developmental basis for increased leaf  
1359 thickness in the *Arabidopsis Cvi* ecotype. *Front Plant Sci* **9**, (2018).
- 1360 45. Conte, M., de Simone, S., Simmons, S. J., Ballaré, C. L. & Stapleton, A. E. Chromosomal  
1361 loci important for cotyledon opening under UV-B in *Arabidopsis thaliana*. *BMC Plant Biol.*  
1362 **10**, 112 (2010).
- 1363 46. Darrah, C. *et al.* Analysis of phase of LUCIFERASE expression reveals novel circadian  
1364 quantitative trait loci in *Arabidopsis*. *Plant Physiol.* **140**, 1464–1474 (2006).
- 1365 47. DeRose-Wilson, L. & Gaut, B. S. Mapping salinity tolerance during *Arabidopsis thaliana*  
1366 germination and seedling growth. *PLOS ONE* **6**, e22832 (2011).
- 1367 48. Edwards, K. D., Lynn, J. R., Gyula, P., Nagy, F. & Millar, A. J. Natural allelic variation in  
1368 the temperature-compensation mechanisms of the *Arabidopsis thaliana* circadian clock.  
1369 *Genetics* **170**, 387–400 (2005).
- 1370 49. Fournier-Level, A. *et al.* Paths to selection on life history loci in different natural  
1371 environments across the native range of *Arabidopsis thaliana*. *Mol Ecol* **22**, 3552–3566  
1372 (2013).

- 1373 50. Gilliland, L. U. *et al.* Genetic basis for natural variation in seed vitamin E levels in  
1374 *Arabidopsis thaliana*. *PNAS* **103**, 18834–18841 (2006).
- 1375 51. Hobbs, D. H., Flintham, J. E. & Hills, M. J. Genetic control of storage oil synthesis in seeds  
1376 of *Arabidopsis*. *Plant Physiol.* **136**, 3341–3349 (2004).
- 1377 52. Kasulin, L., Agrofoglio, Y. & Botto, J. F. The receptor-like kinase ERECTA contributes to  
1378 the shade-avoidance syndrome in a background-dependent manner. *Ann Bot* **111**, 811–819  
1379 (2013).
- 1380 53. Keurentjes, J. J. *et al.* Integrative analyses of genetic variation in enzyme activities of  
1381 primary carbohydrate metabolism reveal distinct modes of regulation in *Arabidopsis*  
1382 *thaliana*. *Genome Biol.* **9**, R129 (2008).
- 1383 54. Kliebenstein, D. J., Gershenzon, J. & Mitchell-Olds, T. Comparative quantitative trait loci  
1384 mapping of aliphatic, indolic and benzylic glucosinolate production in *Arabidopsis thaliana*  
1385 leaves and seeds. *Genetics* **159**, 359–370 (2001).
- 1386 55. Kliebenstein, D., Pedersen, D., Barker, B. & Mitchell-Olds, T. Comparative analysis of  
1387 quantitative trait loci controlling glucosinolates, myrosinase and insect resistance in  
1388 *Arabidopsis thaliana*. *Genetics* **161**, 325–332 (2002).
- 1389 56. Kobayashi, Y. *et al.* Amino acid polymorphisms in strictly conserved domains of a P-type  
1390 ATPase HMA5 are involved in the mechanism of copper tolerance variation in  
1391 *Arabidopsis*. *Plant Physiol* **148**, 969–980 (2008).

- 1392 57. Laserna, M. P., Sánchez, R. A. & Botto, J. F. Light-related loci controlling seed  
1393 germination in Ler x Cvi and Bay-0 x Sha recombinant inbred-line populations of  
1394 *Arabidopsis thaliana*. *Ann Bot* **102**, 631–642 (2008).
- 1395 58. Lee, S., Sergeeva, L. I. & Vreugdenhil, D. Quantitative trait loci analysis of hormone levels  
1396 in *Arabidopsis* roots. *PLOS ONE* **14**, e0219008 (2019).
- 1397 59. Li, P. *et al.* Fructose sensitivity is suppressed in *Arabidopsis* by the transcription factor  
1398 ANAC089 lacking the membrane-bound domain. *PNAS* **108**, 3436–3441 (2011).
- 1399 60. Luquez, V. M. C. *et al.* Quantitative trait loci analysis of leaf and plant longevity in  
1400 *Arabidopsis thaliana*. *J Exp Bot* **57**, 1363–1372 (2006).
- 1401 61. Moore, C. R., Gronwall, D. S., Miller, N. D. & Spalding, E. P. Mapping quantitative trait  
1402 loci affecting *Arabidopsis thaliana* seed morphology features extracted computationally  
1403 from images. *G3 Bethesda* **3**, 109–118 (2013).
- 1404 62. Nguyen, T.-P., Keizer, P., Eeuwijk, F. van, Smeekens, S. & Bentsink, L. Natural variation  
1405 for seed longevity and seed dormancy are negatively correlated in *Arabidopsis*. *Plant*  
1406 *Physiol.* **160**, 2083–2092 (2012).
- 1407 63. Sergeeva, L. I. *et al.* Histochemical analysis reveals organ-specific quantitative trait loci for  
1408 enzyme activities in *Arabidopsis*. *Plant Physiol* **134**, 237–245 (2004).
- 1409 64. Sergeeva, L. I. *et al.* Vacuolar invertase regulates elongation of *Arabidopsis thaliana* roots  
1410 as revealed by QTL and mutant analysis. *PNAS* **103**, 2994–2999 (2006).

- 1411 65. Snoek, B. L. *et al.* Genetic dissection of morphometric traits reveals that Phytochrome B  
1412 affects nucleus size and heterochromatin organization in *Arabidopsis thaliana*. *G3 Bethesda*  
1413 **7**, 2519–2531 (2017).
- 1414 66. Swarup, K. *et al.* Natural allelic variation identifies new genes in the *Arabidopsis* circadian  
1415 system. *Plant J.* **20**, 67–77 (1999).
- 1416 67. Symonds, V. V. *et al.* Mapping quantitative trait loci in multiple populations of *Arabidopsis*  
1417 *thaliana* identifies natural allelic Variation for trichome density. *Genetics* **169**, 1649–1658  
1418 (2005).
- 1419 68. Teng, S., Keurentjes, J., Bentsink, L., Koornneef, M. & Smeekens, S. Sucrose-specific  
1420 induction of anthocyanin biosynthesis in *Arabidopsis* requires the MYB75/PAP1 gene.  
1421 *Plant Physiol.* **139**, 1840–1852 (2005).
- 1422 69. Tessadori, F. *et al.* PHYTOCHROME B and HISTONE DEACETYLASE 6 control light-  
1423 induced chromatin compaction in *Arabidopsis thaliana*. *PLOS Genet.* **5**, e1000638 (2009).
- 1424 70. Ungerer, M. C., Halldorsdottir, S. S., Modliszewski, J. L., Mackay, T. F. C. & Purugganan,  
1425 M. D. Quantitative trait loci for inflorescence development in *Arabidopsis thaliana*.  
1426 *Genetics* **160**, 1133–1151 (2002).
- 1427 71. Vasseur, F., Bontpart, T., Dauzat, M., Granier, C. & Vile, D. Multivariate genetic analysis  
1428 of plant responses to water deficit and high temperature revealed contrasting adaptive  
1429 strategies. *J Exp Bot* **65**, 6457–6469 (2014).

- 1430 72. Vaughn, L. M. & Masson, P. H. A QTL study for regions contributing to *Arabidopsis*  
1431 *thaliana* root skewing on tilted surfaces. *G3 Genes Genomes Genet.* **1**, 105–115 (2011).
- 1432 73. Velázquez, I., Valencia, S., López-Lera, A., de la Peña, A. & Candela, M. Analysis of  
1433 natural allelic variation in in vitro organogenesis of *Arabidopsis thaliana*. *Euphytica* **137**,  
1434 73–79 (2004).
- 1435 74. Ward, J. K. *et al.* Identification of a major QTL that alters flowering time at elevated [CO<sub>2</sub>]  
1436 in *Arabidopsis thaliana*. *PLOS ONE* **7**, e49028 (2012).
- 1437 75. Waters, B. M. & Grusak, M. A. Quantitative trait locus mapping for seed mineral  
1438 concentrations in two *Arabidopsis thaliana* recombinant inbred populations. *New Phytol.*  
1439 **179**, 1033–1047 (2008).
- 1440 76. Juenger, T. E. *et al.* Identification and characterization of QTL underlying whole-plant  
1441 physiology in *Arabidopsis thaliana*:  $\delta^{13}\text{C}$ , stomatal conductance and transpiration  
1442 efficiency. *Plant Cell Environ.* **28**, 697–708 (2005).
- 1443 77. Juenger, T., Pérez-Pérez, J. M., Bernal, S. & Micol, J. L. Quantitative trait loci mapping of  
1444 floral and leaf morphology traits in *Arabidopsis thaliana*: evidence for modular genetic  
1445 architecture. *Evol Dev* **7**, 259–271 (2005).
- 1446 78. Aranzana, M. J. *et al.* Genome-wide association mapping in *Arabidopsis* identifies  
1447 previously known flowering time and pathogen resistance genes. *PLoS Genet* **1**, (2005).
- 1448 79. Bikard, D. *et al.* Divergent evolution of duplicate genes leads to genetic incompatibilities  
1449 within *A. thaliana*. *Science* **323**, 623–626 (2009).



- 1450 80. Brachi, B. *et al.* Linkage and association mapping of *Arabidopsis thaliana* flowering time  
1451 in nature. *PLOS Genet.* **6**, e1000940 (2010).
- 1452 81. Dunning, F. M., Sun, W., Jansen, K. L., Helft, L. & Bent, A. F. Identification and  
1453 mutational analysis of *Arabidopsis* FLS2 leucine-rich repeat domain residues that  
1454 contribute to flagellin perception. *Plant Cell* **19**, 3297–3313 (2007).
- 1455 82. Egli, B., Kölling, K., Köhler, C., Zeeman, S. C. & Streb, S. Loss of cytosolic  
1456 phosphoglucomutase compromises gametophyte development in *Arabidopsis*. *Plant*  
1457 *Physiol.* **154**, 1659–1671 (2010).
- 1458 83. Ehrenreich, I. M., Stafford, P. A. & Purugganan, M. D. The genetic architecture of shoot  
1459 branching in *Arabidopsis thaliana*: A comparative assessment of candidate gene  
1460 associations vs. quantitative trait locus mapping. *Genetics* **176**, 1223–1236 (2007).
- 1461 84. El-Din El-Assal, S., Alonso-Blanco, C., Peeters, A. J. M., Raz, V. & Koornneef, M. A QTL  
1462 for flowering time in *Arabidopsis* reveals a novel allele of CRY2. *Nat. Genet.* **29**, 435–440  
1463 (2001).
- 1464 85. Fulcher, N. *et al.* Genetic architecture of natural variation of telomere length in *Arabidopsis*  
1465 *thaliana*. *Genetics* **199**, 625–635 (2015).
- 1466 86. Gazzani, S., Gendall, A. R., Lister, C. & Dean, C. Analysis of the molecular basis of  
1467 flowering time variation in *Arabidopsis* accessions. *Plant Physiol* **132**, 1107–1114 (2003).
- 1468 87. Kadirjan-Kalbach, D. K. *et al.* Allelic variation in the chloroplast division gene FtsZ2-2  
1469 leads to natural variation in chloroplast size. *Plant Physiol.* **181**, 1059–1074 (2019).

- 1470 88. Kim, T.-S., Wang, L., Kim, Y. J. & Somers, D. E. Compensatory mutations in GI and ZTL  
1471 may modulate temperature compensation in the circadian clock. *Plant Physiol.* **182**, 1130–  
1472 1141 (2020).
- 1473 89. Kooke, R. *et al.* Genome-wide association mapping and genomic prediction elucidate the  
1474 genetic architecture of morphological traits in *Arabidopsis*. *Plant Physiol.* **170**, 2187–2203  
1475 (2016).
- 1476 90. Leskow, C. C. *et al.* Allelic differences in a vacuolar invertase affect *Arabidopsis* growth at  
1477 early plant development. *J Exp Bot* **67**, 4091–4103 (2016).
- 1478 91. Li, W. *et al.* Identification of quantitative trait loci controlling high calcium response in  
1479 *Arabidopsis thaliana*. *PLOS ONE* **9**, e112511 (2014).
- 1480 92. Marais, D. L. D. *et al.* Variation in MPK12 affects water use efficiency in *Arabidopsis* and  
1481 reveals a pleiotropic link between guard cell size and ABA response. *PNAS* **111**, 2836–  
1482 2841 (2014).
- 1483 93. Ouibrahim, L. *et al.* Cloning of the *Arabidopsis* *rwm1* gene for resistance to Watermelon  
1484 mosaic virus points to a new function for natural virus resistance genes. *Plant J* **79**, 705–  
1485 716 (2014).
- 1486 94. Routaboul, J.-M. *et al.* Metabolite profiling and quantitative genetics of natural variation for  
1487 flavonoids in *Arabidopsis*. *J Exp Bot* **63**, 3749–3764 (2012).

- 1488 95. Seedat, N., Dinsdale, A., Ong, E. K. & Gendall, A. R. Acceleration of flowering in  
1489 *Arabidopsis thaliana* by Cape Verde Islands alleles of FLOWERING H is dependent on the  
1490 floral promoter FD. *J Exp Bot* **64**, 2767–2778 (2013).
- 1491 96. Yano, R., Takebayashi, Y., Nambara, E., Kamiya, Y. & Seo, M. Combining association  
1492 mapping and transcriptomics identify HD2B histone deacetylase as a genetic factor  
1493 associated with seed dormancy in *Arabidopsis thaliana*. *Plant J* **74**, 815–828 (2013).
- 1494 97. Yuan, W., Flowers, J. M., Sahraie, D. J. & Purugganan, M. D. Cryptic genetic variation for  
1495 *Arabidopsis thaliana* seed germination speed in a novel salt stress environment. *G3 Genes  
1496 Genomes Genet.* **6**, 3129–3138 (2016).
- 1497 98. Alonso-Blanco, C., Bentsink, L., Hanhart, C. J., Vries, H. B. & Koornneef, M. Analysis of  
1498 natural allelic variation at seed dormancy loci of *Arabidopsis thaliana*. *Genetics* **164**, 711–  
1499 729 (2003).
- 1500 99. Moore, C. R. *et al.* High-throughput computer vision introduces the time axis to a  
1501 quantitative trait map of a plant growth response. *Genetics* **195**, 1077–1086 (2013).
- 1502 100. O’Neill, C. M. *et al.* Towards the genetic architecture of seed lipid biosynthesis and  
1503 accumulation in *Arabidopsis thaliana*. *Heredity* **108**, 115–123 (2012).
- 1504 101. Nguyen, T.-P., Cueff, G., Hegedus, D. D., Rajjou, L. & Bentsink, L. A role for seed storage  
1505 proteins in *Arabidopsis* seed longevity. *J Exp Bot* **66**, 6399–6413 (2015).
- 1506 102. Keurentjes, J. J. B. *et al.* Regulatory network construction in *Arabidopsis* by using genome-  
1507 wide gene expression quantitative trait loci. *PNAS* **104**, 1708–1713 (2007).

- 1508 103. McKhann, H. I. *et al.* Natural variation in CBF gene sequence, gene expression and  
1509 freezing tolerance in the Versailles core collection of *Arabidopsis thaliana*. *BMC Plant*  
1510 *Biol.* **8**, 105 (2008).
- 1511 104. Poque, S. *et al.* Allelic variation at the rpv1 locus controls partial resistance to *Plum pox*  
1512 virus infection in *Arabidopsis thaliana*. *BMC Plant Biol.* **15**, 159 (2015).
- 1513 105. Kuhn, M. Building predictive models in R using the caret package. *J. Stat. Softw.* **28**,  
1514 (2008).
- 1515 106. Signorell, A. *DescTools: tools for descriptive statistics*. (2020).
- 1516 107. Fisher, R. A. Statistical methods for research workers. in *Breakthroughs in Statistics:*  
1517 *Methodology and Distribution* (eds. Kotz, S. & Johnson, N. L.) 66–70 (Springer, 1992).  
1518 doi:10.1007/978-1-4612-4380-9\_6.
- 1519 108. Moulos, P. & Hatzis, P. Systematic integration of RNA-Seq statistical algorithms for  
1520 accurate detection of differential gene expression patterns. *Nucleic Acids Res* **43**, e25–e25  
1521 (2015).
- 1522 109. Shindo, C. *et al.* Role of FRIGIDA and FLOWERING LOCUS C in determining variation  
1523 in flowering time of *Arabidopsis*. *Plant Physiol* **138**, 1163 (2005).
- 1524 110. Werner, J. D. *et al.* FRIGIDA-independent variation in flowering time of natural  
1525 *Arabidopsis thaliana* accessions. *Genetics* **170**, 1197–1207 (2005).
- 1526 111. Michaels, S. D. & Amasino, R. M. FLOWERING LOCUS C encodes a novel MADS  
1527 domain protein that acts as a repressor of flowering. *Plant Cell* **11**, 949 (1999).

- 1528 112. Mendiburu, F. *Agricolae*: statistical procedures for agricultural research. *R Package Version*  
1529 **1**, 1–8 (2010).
- 1530 113. Speidel, L., Forest, M., Shi, S. & Myers, S. R. A method for genome-wide genealogy  
1531 estimation for thousands of samples. *Nat. Genet.* **51**, 1321–1329 (2019).
- 1532 114. Li, H. A statistical framework for SNP calling, mutation discovery, association mapping  
1533 and population genetical parameter estimation from sequencing data. *Bioinformatics* **27**,  
1534 2987–2993 (2011).
- 1535 115. Ossowski, S. *et al.* The rate and molecular spectrum of spontaneous mutations in  
1536 *Arabidopsis thaliana*. *Science* **327**, 92–94 (2010).
- 1537 116. Salomé, P. A. *et al.* The recombination landscape in *Arabidopsis thaliana* F2 populations.  
1538 *Hered. Edinb* **108**, 447–455 (2012).
- 1539 117. Bomblies, K. *et al.* Local-scale patterns of genetic variability, outcrossing, and spatial  
1540 structure in natural stands of *Arabidopsis thaliana*. *PLoS Genet* **6**, e1000890 (2010).
- 1541 118. Speidel, L. *et al.* Inferring population histories for ancient genomes using genome-wide  
1542 genealogies. *Mol. Biol. Evol.* (2021) doi:10.1093/molbev/msab174.
- 1543 119. Stern, A. J., Wilton, P. R. & Nielsen, R. An approximate full-likelihood method for  
1544 inferring selection and allele frequency trajectories from DNA sequence data. *PLOS Genet.*  
1545 **15**, e1008384 (2019).
- 1546 120. Gillespie, J. H. Some properties of finite populations experiencing strong selection and  
1547 weak mutation. *Am. Nat.* **121**, 691–708 (1983).

- 1548 121. Gillespie, J. H. Molecular evolution over the mutational landscape. *Evolution* **38**, 1116–  
1549 1129 (1984).
- 1550 122. Gillespie, J. H. *The causes of molecular evolution*. (Oxford University Press, 1991).
- 1551 123. Zhang, L. & Jiménez-Gómez, J. M. Functional analysis of FRIGIDA using naturally  
1552 occurring variation in *Arabidopsis thaliana*. *Plant J.* **103**, 154–165 (2020).
- 1553 124. Sheldon, C. C., Conn, A. B., Dennis, E. S. & Peacock, W. J. Different regulatory regions  
1554 are required for the vernalization-induced repression of FLOWERING LOCUS C and for  
1555 the epigenetic maintenance of repression. *Plant Cell* **14**, 2527–2537 (2002).
- 1556 125. Caicedo, A. L., Stinchcombe, J. R., Olsen, K. M., Schmitt, J. & Purugganan, M. D.  
1557 Epistatic interaction between *Arabidopsis* FRI and FLC flowering time genes generates a  
1558 latitudinal cline in a life history trait. *Proc Natl Acad Sci USA* **101**, 15670–15675 (2004).
- 1559 126. Sung, S. *et al.* Epigenetic maintenance of the vernalized state in *Arabidopsis thaliana*  
1560 requires LIKE HETEROCHROMATIN PROTEIN 1. *Nat. Genet.* **38**, 706–710 (2006).
- 1561 127. Lawson, D. J., Hellenthal, G., Myers, S. & Falush, D. Inference of population structure  
1562 using dense haplotype data. *PLoS Genet* **8**, e1002453 (2012).
- 1563 128. Alonso-Blanco, C. *et al.* 1,135 genomes reveal the global pattern of polymorphism in  
1564 *Arabidopsis thaliana*. *Cell* **166**, 481–491 (2016).
- 1565 129. Boggs, N. A., Nasrallah, J. B. & Nasrallah, M. E. Independent S-locus mutations caused  
1566 self-fertility in *Arabidopsis thaliana*. *PLOS Genet.* **5**, e1000426 (2009).

- 1567 130. Sherman-Broyles, S. *et al.* S locus genes and the evolution of self-fertility in *Arabidopsis*  
1568 *thaliana*. *Plant Cell* **19**, 94–106 (2007).
- 1569 131. Shimizu, K. K., Shimizu-Inatsugi, R., Tsuchimatsu, T. & Purugganan, M. D. Independent  
1570 origins of self-compatibility in *Arabidopsis thaliana*. *Mol. Ecol.* **17**, 704–714 (2008).
- 1571 132. Shimizu, K. K. & Tsuchimatsu, T. Evolution of selfing: recurrent patterns in molecular  
1572 adaptation. *Annu. Rev. Ecol. Evol. Syst.* **46**, 593–622 (2015).
- 1573 133. Tsuchimatsu, T. *et al.* Patterns of polymorphism at the self-incompatibility locus in 1,083  
1574 *Arabidopsis thaliana* genomes. *Mol. Biol. Evol.* **34**, 1878–1889 (2017).
- 1575 134. Schiffels, S. & Wang, K. MSMC and MSMC2: the multiple sequentially Markovian  
1576 coalescent. *Methods Mol Biol* **2090**, 147–166 (2020).
- 1577 135. Wright, S. Isolation by Distance. *Genetics* **28**, 114–138 (1943).
- 1578 136. Malécot, M. Les mathématiques de l'hérédité. *Bull. Mens. Société Linn. Lyon* 203 (1948).
- 1579 137. Loveless, M. D. & Hamrick, J. L. Ecological determinants of genetic structure in plant  
1580 populations. *Annu. Rev. Ecol. Syst.* **15**, 65–95 (1984).
- 1581 138. Schmid, K. J. *et al.* Evidence for a large-scale population structure of *Arabidopsis thaliana*  
1582 from genome-wide single nucleotide polymorphism markers. *Theor. Appl. Genet.* **112**,  
1583 1104–1114 (2006).
- 1584 139. Platt, A. *et al.* The scale of population structure in *Arabidopsis thaliana*. *PLOS Genet.* **6**,  
1585 e1000843 (2010).

- 1586 140. Nordborg, M. *et al.* The pattern of polymorphism in *Arabidopsis thaliana*. *PLOS Biol.* **3**,  
1587 e196 (2005).
- 1588 141. Horton, M. W. *et al.* Genome-wide patterns of genetic variation in worldwide *Arabidopsis*  
1589 *thaliana* accessions from the RegMap panel. *Nat. Genet.* **44**, 212–216 (2012).
- 1590 142. Zhou, X. & Stephens, M. Genome-wide efficient mixed-model analysis for association  
1591 studies. *Nat Genet* **44**, 821–824 (2012).
- 1592 143. Coupland, G. FLOWERING LOCUS C isolation and characterization: two articles that  
1593 opened many doors. *Plant Cell* **31**, 1190 (2019).
- 1594 144. Salathia, N. *et al.* FLOWERING LOCUS C -dependent and -independent regulation of the  
1595 circadian clock by the autonomous and vernalization pathways. *BMC Plant Biol* **6**, 10  
1596 (2006).
- 1597 145. Osmond, M. M., Otto, S. P. & Martin, G. Genetic paths to evolutionary rescue and the  
1598 distribution of fitness effects along them. *Genetics* **214**, 493–510 (2020).
- 1599 146. Szendro, I. G., Franke, J., de Visser, J. A. G. M. & Krug, J. Predictability of evolution  
1600 depends nonmonotonically on population size. *Proc. Natl. Acad. Sci.* **110**, 571–576 (2013).
- 1601 147. Orr, H. A. Theories of adaptation: what they do and don't say. *Genetica* **123**, 3–13 (2005).
- 1602 148. Orr, H. A. The population genetics of adaptation: the adaptation of DNA sequences.  
1603 *Evolution* **56**, 1317–1330 (2002).



- 1604 149. Barghi, N., Hermisson, J. & Schlötterer, C. Polygenic adaptation: a unifying framework to  
1605 understand positive selection. *Nat. Rev. Genet.* 1–13 (2020) doi:10.1038/s41576-020-0250-  
1606 z.
- 1607 150. Höllinger, I., Pennings, P. S. & Hermisson, J. Polygenic adaptation: From sweeps to subtle  
1608 frequency shifts. *PLOS Genet.* **15**, e1008035 (2019).
- 1609 151. Cho, L.-H., Yoon, J. & An, G. The control of flowering time by environmental factors.  
1610 *Plant J.* **90**, 708–719 (2017).
- 1611 152. Bloomer, R. H. & Dean, C. Fine-tuning timing: natural variation informs the mechanistic  
1612 basis of the switch to flowering in *Arabidopsis thaliana*. *J. Exp. Bot.* **68**, 5439–5452 (2017).
- 1613 153. Mouradov, A., Cremer, F. & Coupland, G. Control of flowering time: interacting pathways  
1614 as a basis for diversity. *Plant Cell* **14**, S111–S130 (2002).
- 1615 154. He, Y., Chen, T. & Zeng, X. Genetic and epigenetic understanding of the seasonal timing of  
1616 flowering. *Plant Commun.* **1**, (2020).
- 1617 155. Korcuć, P., Schippers, J. H. M. & Walther, D. Characterization and identification of cis-  
1618 regulatory elements in *Arabidopsis* based on single-nucleotide polymorphism information.  
1619 *Plant Physiol.* **164**, 181–200 (2014).
- 1620 156. Johanson, U. *et al.* Molecular analysis of FRIGIDA, a major determinant of natural  
1621 variation in *Arabidopsis* flowering time. *Science* **290**, 344–347 (2000).
- 1622 157. Schläppi, M. RNA levels and activity of FLOWERING LOCUS C are modified in mixed  
1623 genetic backgrounds of *Arabidopsis thaliana*. *Int. J. Plant Sci.* **162**, 527–537 (2001).

- 1624 158. Le Corre, V., Roux, F. & Reboud, X. DNA polymorphism at the FRIGIDA gene in  
1625 *Arabidopsis thaliana*: extensive nonsynonymous variation is consistent with local selection  
1626 for flowering time. *Mol Biol Evol* **19**, 1261–1271 (2002).
- 1627 159. Michaels, S. D., He, Y., Scortecci, K. C. & Amasino, R. M. Attenuation of FLOWERING  
1628 LOCUS C activity as a mechanism for the evolution of summer-annual flowering behavior  
1629 in *Arabidopsis*. *Proc. Natl. Acad. Sci.* **100**, 10102–10107 (2003).
- 1630 160. Google Earth. Santo Antão: 17 degrees 10' N 25 degrees 05' W to 14 degrees 55' N 24  
1631 degrees 17' W.
- 1632 161. Google Earth. Fogo: 15 degrees 10' N 24 degrees 25' W, 14 degrees 55' N 24 degrees 17'  
1633 W.
- 1634 162. Esri. World Imagery 1:5x01<sup>7</sup>. (2009).
- 1635 163. Graul, C. *Interactive Web-Maps Based on the Leaflet JavaScript Library*. (2016).
- 1636
